# Supplementary material for: Reduced rice paddy methane emission through dual compound mechanism in novel cultivars
Source: Research Square preprint supplement (doi:10.21203/rs.3.rs-1087173/v1), 2021-12-16
Supplement: Supplementary file 1 [file ad9dfdce7e61d66988a0f24d.docx]

**Reduced rice paddy methane emission through dual compound mechanism in novel cultivars**

Yunkai Jin1§, Tong Liu2§, Jia Hu1§, Kai Sun3§, Lihong Xue4§, Mathilde Bettembourg1, Pengfu Hou4, Peiying Hao3, Jintian Tang3, Zihong Ye3, Chunlin Liu5, Peng Li6, Aihu Pan6, Lushui Wang7, Guoying Xiao7, Ali A Moazzami2, Xiaoping Yu3, Anna Schnürer2* & Chuanxin Sun1*

1, Department of Plant Biology, Uppsala BioCenter, Linnean Centre for Plant Biology, Swedish University of Agricultural Sciences (SLU), PO Box 7080, SE-75007 Uppsala, Sweden

2, Department of Molecular Sciences, Uppsala BioCenter, Swedish University of Agricultural Sciences (SLU), PO Box 7015, SE-75007 Uppsala, Sweden

3, Zhejiang Provincial Key Laboratory of Biometrology and Inspection and Quarantine, College of Life Science, China Jiliang University, Hangzou 310018, China

4, Key Laboratory of Agro-environment in Downstream of Yangtze plain, Ministry of Agriculture and Rural Affairs of China, Nanjing, 210014, China

5, Hunan Provincial Key Laboratory of Crop Germplasm Innovation and Utilization, Hunan Agricultural University, Changsha 410128, China

6, Biotechnology Research Institute, Shanghai Academy of Agricultural Science, Shanghai, 201106, China.

7, Institute of Subtropical Agriculture, Chinese Academy of Sciences, Changsha 410125, China

**§Equal contributors**

***Author for correspondence:**

Chuanxin Sun

Department of Plant Biology, Uppsala BioCenter, Linnean Centre for Plant Biology, Swedish University of Agricultural Science (SLU), P.O. Box 7080, SE-75007 Uppsala, Sweden

Email: [Chuanxin.Sun@slu.se](mailto:Chuanxin.Sun@slu.se); Tel: +46-18-673252

Anna Schnürer

Department of Molecular Sciences, Uppsala BioCenter, Swedish University of Agricultural Sciences (SLU), PO Box 7015, SE-75007 Uppsala, Sweden

Email: [Anna.Schnurer@slu.se](mailto:Anna.Schnurer@slu.se); Tel: +46 18 673288

**Methods**

**Plant materials and growth conditions**

Rice plants of the Nipponbare (*Oryza sativa L. ssp*. Japonica) variety and transformed homozygote line SUSIBA2 (No. 7713) were grown in a phytotron in cylinder pots (10 L) with organic soil containing plant residues. Phytotron growth management was the same as that described previously13, with 14 h light/10 h dark at 30 °C /21 °C, a constant relative humidity of 80 % and light intensity of 400 mmol photons m-2 s-1. Field trials were performed in a similar way to those described previously13, under natural conditions in Changsha (ca. 24 °C-33 °C, 80 % humidity) and Shanghai (ca. 25 °C-32 °C, 80 % humidity) in the year of 2020, and in Nanjing (ca. 22 °C-35 °C, 80 % humidity) and Chaohu (ca. 22 °C-32 °C, 80 % humidity) in the year of 2021. Nipponbare, Suxiangjing 100, Chuangliangyou 276, breeding lines and corresponding parents were used in the field. Ridges 30 cm wide were created between different chemical treatments to prevent diffusion.

**Methane collection in the phytotron and rice paddies**

Methane sampling and quantification were performed according to previously published protocols13. Individual rice plants were covered with a sealed plastic cylinder (diameter: 15 cm, height: 95 cm). In the phytotron, methane was collected from 2.00 pm after 15 min coverage for each plant. Gas samples (2 X 50 ml) were taken from the headspace of four independent plants by a syringe and pooled in a sealed vial. In 2020, breeding lines of generation 5 and Nipponbare were growing from July to October in paddies, and the sampling time is from 2.00 pm. Gas was taken from at least six independent plants after being covered for 15 min and pooled in gas bags. And for the field trials of 2021, July to October was also arranged for the growing of breeding lines of generation 6 and locally promoted cultivars. Methane sampling time is 10.00 am. The methane collection of tillering stage for breeding lines in Chaohu was missed because of the pandemic. Gas was taken from 10 independent plants after being covered for 15 min and pooled in gas bags. Three technical replicates were taken in the phytotron, i.e. three vials for each plant methane collection. All gas samples were analysed by gas chromatography with appropriate methane standards. An air methane concentration of 1.8 p.p.m. was used as the background for calculations. The methane flux was calculated according to the formula previously described16.

**Fumarate, oxantel and ethanol treatments**

For the fumarate treatment, 1 L 10 mM fumaric acid dissolved in water was added to the 10 L rice growing pot, and this treatment was performed every two days. Sampling for analyses of methane emissions and soil DNA extraction was performed two weeks later. In field trials, 10 mM fumarate was used for irrigation, and the second time treatment was completed one week later. As in the pot experiment, samples for analyses of methane emissions and DNA extraction were collected two weeks later. The oxantel treatment procedure was performed in the same way as the fumarate treatment in both the phytotron and the field, but with a concentration of 1 mM.

For ethanol treatment in the phytotron, 1L of 10 mM ethanol solution was added to the 10 L rice growing pot, and the treatment was performed every two days. Samples for methane emission and DNA extraction were collected six days later. In field trials, 10 mM ethanol was used for irrigation, and then samples for methane analysis and soil DNA extraction were taken one week later except Shanghai, 2020, where methane was collected two weeks later because of the pandemic.

Rhizosphere and root from ca. 5 cm depth and 5 cm from the rice plant were used for DNA extraction and analyses of methanogenic abundance for all the treatments and the control. In the phytotron, plants of 6 weeks after planting (wap) were used for the fumarate and oxantel treatments, and plants of 4 wap were used for the ethanol treatment. In rice paddies, plants of 5 wap were used for fumarate, oxantel and ethanol.

**Sample Collection of Rhizosphere, Rhizoplane and Endosphere Fractions**

Samples from the horizontal level were collected as described by Edwards14 with slight modifications. Briefly, rice of 8 wap was used, excess soil was manually shaken from the roots, leaving approximately 1 mm of soil still attached to the roots (Supplementary Fig. 4a). The root attached with 1 mm soil was put in a sterile flask with 50 ml of sterile 0.1 M phosphate buffer, and then stirred vigorously with sterile forceps in order to clean all the soil from the root surfaces. The soil solution obtained (cleaned from the roots) was poured into a 50 ml Falcon tube and stored as the rhizosphere compartment at -70 °C. Residual roots were put into a falcon tube with 20 ml 0.1 M sterile phosphate buffer and then sonicated for 1 minute at 50-60 Hz (output frequency 42 kHz, power 90 W). The solution was poured into a new 50 ml Falcon tube and the procedure was repeated once again with residual root, and the all the liquid was pooled together and stored in the same way as the rhizoplane at -70 °C. The root left was used as endosphere and ground into fine powder and stored at -70 °C for further use. Before DNA extraction and metabolite analysis, all the liquid (rhizosphere and rhizoplane) and root powder (endosphere) were freeze-dried. Forty mg of the freeze-dried samples were used for DNA extraction, and 100 mg were used for metabolite analysis (NMR).

**Root secretion**

Plants of 4 wap were removed from the pot soil, and the rice roots rinsed with distilled water three times in order to remove attached soil and microbes. Rinsed roots were then inserted into a 50 ml Falcon tube filled with 40 ml MilliQ water. The Falcon tubes were sealed with parafilm and then put back in the phytotron for 2 h, using the same incubation conditions as for rice growth. After incubation the roots were removed and the remaining liquid kept at -70 °C in closed vials until further use.

**NMR analysis**

For analyses of metabolites including fumarate, 100 mg freeze-dried rhizosperic soil or freeze-dried samples of different horizontal sections (soil, rhizosphere, rhizoplane and endosphere; 5 cm depth and 5 cm from the rice plant) from 8 wap were dissolved in 8 ml methanol, vortexed well, sonicated for 10 min at 50-60 Hz, and then vortexed again. Thereafter the samples were centrifuged at 3000 g for 10 min and the obtained supernatant was transferred into a new 15 ml Falcon tube, after which the liquid was subjected to vacuum centrifugation overnight. Then 380 ml MilliQ water was added to the dried samples, vortexed well, sonicated for 10 min at 50-60 Hz, and then vortexed again. After another centrifugation at 3000 g for 10 min, 350 µl of the supernatant was transferred into a 1.5 ml Eppendorf tube together with NMR analysis solutions: 50 µl D2O, 30 µl Internal Standard (TPS, 5.8 mM), 20 µl MilliQ water, and 150 µl 0.4 M phosphate buffer (PH= 7). After mixing, 580 µl of the solution was used for NMR analysis, as described previously21.

For metabolite analysis of total including volatile substances, fresh soil and root were sampled from pots and 2 g fresh rhizospheric soil including root were vortexed in 10 ml MilliQ water, and thereafter centrifuged at 3000 g for 10 min. Then 350 µl of the obtained supernatant was transferred into a new 1.5 ml Eppendorf tube, and NMR solution, as described above, was added. For root secretion analysis, the solution was collected as described above, and then centrifuged at 3000 g for 10 min. Subsequently 460 µl supernatant was mixed with 50 µl D2O, 30 µl Internal Standard (5.8 mM) and 60 µl 1 M phosphate buffer (PH=7). NMR analysis was performed as previously described21, 22. 1H-NMR spectra were acquired using a Bruker Avance III spectrometer. The spectrometer operated at 600 MHz and was equipped with a cryogenically cooled probe and autosampler. NMR spectra were recorded with a zgesgp pulse sequence (Bruker Biospin) (25 °C, 128 transients, 4 s relaxation delay, 65 536 data points and spectral width of 17 942).

**Gene expression analysis by quantitative PCR (qPCR) and RNA-seq**

RNA isolation and DNA digestion were performed in accordance with previous studies13,23. In brief, rice root from 5 wap was sampled at 3.00 pm and ground into fine powder in liquid nitrogen, and total RNA was isolated by the Spectrum Plant Total RNA Kit (Sigma-Aldrich) according to the manufacturer’s protocol using ca. 150 mg rice root. All the samples were treated with DNase I (Sigma-Aldrich) to remove trace amounts of DNA contamination. cDNA synthesis and qPCR analysis were performed as previously described13,23. *Ubiquitin10* was used as the reference gene. All the primers used are listed in SI Table 2. Total RNA was sent to SciLife Lab (NBIS, Sweden) for transcriptome and bio-informatic analysis24-26. The Illumina Hiseq platform was used for RNA-seq on one HiSeq2500 lane, resulting in approximately 15 M read pairs per sample, and three replicates were used. In the analysis, a cut-off of a 5 % false discovery rate was used, and genes with log2fold change >1 or <-1 and *q*-value < 0.05 were manually assigned as differentially expressed.

Ethanol treatment of rice pots and rice roots

For ethanol treatment of rice in pots (in-pot), week 4 Nipponbare was used and 1 L of ethanol solution at different concentrations (10, 20, 40, 60 mM) were added to the pots. Ethanol was again added after one day of incubation, i.e., ethanol was added in two successive days. Root was harvested two days later and used for RNA isolation and gene expression analysis. For root treatment (out-pot), Nipponbare of week 4 was removed from the pot, and rice roots were rinsed with distilled water in order to remove attached soil and microbes. Rinsed roots were then inserted into a 100 ml Falcon tube filled with 50 ml ethanol solution at different concentrations (10, 20, 40, 60 mM). The Falcon tubes were sealed with parafilm and then put back in the phytotron for 2 days, using the same incubation conditions as for rice growth. After treatment, rice roots were harvested and used for RNA isolation and gene expression analysis.

**qPCR quantification of methanogenic communities and *Geobacter***

All the samples for methanogenic community analysis were collected at 3.00 pm. DNA extraction was performed using ca 600 mg fresh rhizospheric samples, including root from 8 wap for different horizontal sections (ref. Supplementary Fig. 4a), ca 400 mg freeze-dried root and rhizospheric soil samples (5 cm depth and 5 cm from the rice plant) from rice paddies, and ca. 500 mg fresh root including rhizospheric samples from different chemical treatments (fumarate, oxantel and ethanol), vertical positions and seasonal rhizosphere in the phytotron. The extracted DNA was used for PCR quantification (qPCR) of different methanogenic groups as previously described12. Briefly, qPCR quantification was performed using the standard of a previously cloned 16S rRNA gene fragment from different pure cultures of methanogens13, 27,28 and a newly PCR-cloned 16S rRNA gene fragment of *Geobacter sulfurreducens* (*G. Sulf*). The qPCR programme and copy number quantification for each group of methanogens were performed as described previously13. The abbreviations for each group are Mst (Methanosaetaceae), MSc (Methanosarcinaceae), MBT (Methanobacteriales), MMB (Methanomicrobiales), ARC (archaea), Met (Methanocella-specific) and MET (methanogens), as previously described13,28. The standard curve for quantification of *Geobacter sulfurreducens* (*G. Sulf*) was prepared using DNA extracted from soil as a template to generate a 16S rRNA gene fragment based on the sequence, as described previously15. Genomic DNA of *G. Sulf* was isolated by the DNA isolation kit for soil organisms (FastDNA SPIN Kit for Soil; MP Biomedicals, LLC) and used as a PCR template for PCR-based cloning of 16S rRNA. PCR-amplified products were subcloned into a PCR cloning vector by the TOPO10 TA cloning kit (Life Technologies Europe BV). The cloned genes were verified by DNA sequencing. The qPCR program for *G. Sulf* was as follows: 95 °C for 7 min, then 54 cycles of 40 s at 95 °C, 1 min at 58 °C and 40 s at 72 °C, and melting curves were from 55 °C to 95 °C with an increase of 0.05 °C per second. The abundance of each group was calculated and translated to DNA copy numbers for each gram of dry sample. All the primers used are listed in SI Table 2.

**Rice breeding and progeny screening**

Rice hybridization was performed according to Poehlman and Sleper29. Briefly, screened low-methane rice was selected as the paternal line and elite rice that is typically used for large scale cultivation was used as different maternal lines. Breeding was performed in a phytotron. After hybridization, segregation occurred at the F2 generation. Rice plants showing low-fumarate high-ethanol secretion, low methane levels and high yield potentials were selected and used to perform a next-generation screening. Lines with a stable low-fumarate high-ethanol secretion properties were used for methane emission and further analysis.

***In vitro* anaerobic culturing of rhizospheric soil samples for the fumarate treatment and enrichment of the key rhizospheric methanogens**

Fresh rhizospheric soil samples were retrieved from the Nipp and SUSIBA2 rice pots in the phytotron (5 cm depth and 5 cm from the rice plant at the stage of 8 wap) and used for *in vitro* anaerobic culturing (Fig. 2e). The bicarbonate-buffered basal medium (BM) and anaerobic culture bottles were prepared as described previously30. Then 10 g of the fresh rhizospheric soil (including roots) from the two types of soil were added to each triplicated bottle (118 ml) with and without 10 mM fumarate addition for the test and control groups respectively. The cultures were incubated in the dark at 37 °C without shaking. Methane production was quantified by weekly analyses of the methane content (determined by gas chromatography from 1 mL gas samples) and gas-phase pressure in the bottles, as described previously31, with the modification that no pressure was released during the measurement31. The detailed calculation is documented in the Source Data of Fig. 1e.

In parallel, 2 g of the two soil samples were inoculated in the same set-up of anaerobic culture bottles. After mixing, 2 mL of the culture were transferred to a new anaerobic culture bottle and so on to make a 100 to 10-6 dilution series. Then H2/CO2 (80/20 v/v; 1 atm) was added as an electron and carbon source for the hydrogentrophic methanogens. After ca 90 days’ incubation, both SUSIBA2 and Nipp 10-6 dilution bottles successfully enriched the same genus of *Methanobacterium* (99 % similarity, demonstrated by 16S rRNA gene sequencing, SI Table 3). Only the Nipp bottle was used for the further ethanol inhibition test.

**Ethanol inhibition test with the enriched *methanobacterium* from rhizospheric soil samples and type strain *Methanobacterium formicicum* DSM 1535**

First, 2 mL culture from Nipp 10-6 dilution bottles and *M. formicicum* DSM 1535 (Deutsche Sammlung von Mikroorganismen und Zellkulturen, DSMZ) were respectively inoculated in the same set-up of triplicated anaerobic cultures as described above, with the modification that 309 mL volume serum bottles were used. Then H2/CO2 (80/20 v/v; 1 atm) was added as the electron and carbon source. These cultures were divided into two and three groups, respectively, with the addition of 6 and 60 mM ethanol for the Nipp enrichment, and 10, 20 and 60 mM ethanol for the pure culture of *M. formicicum* DSM 1535. A control group without ethanol addition was set up in parallel (Fig. 2e and g). After 53 days’ incubation, the morphology of Nipp samples was checked by fluorescence microscope (ZEISS Scope. A1, DE) at an excitation light wavelength of 420 nm (Fig. 3f).

**Bacterial and archaeal 16S rRNA gene sequencing and data analysis**

Triplicate DNA samples were retrieved from each section (the same as Supplementary Fig. 4) and fumarate-treated rhizospheric soil (the same as Supplementary Fig. 6d), and then used for bacterial and archaeal community analysis. The 16S rRNA genes were amplified by polymerase chain reaction (PCR), using primer pair 515’F(GTGBCAGCMGCCGCGGTAA) /805R(GACTACHVGGG TATCTAATCC) to obtain the bacteria sequence library and 516F(TGYCAGCCGCCGCGGTAAHACCVGC)/915R(GTGCTCCCCCGCCAATTCCT) for the archaea sequence library32,33. The prepared sequence libraries were processed for next-generation amplicon sequencing by Illumina MiSeq Platform at the SNP&SEQ Technology of the SciLifeLab in Uppsala, Sweden. The raw sequencing data obtained were processed by DADA2 software (version 1.16) with the rRNA database SILVA (release 132), based on amplicon sequence variants (ASVs) to obtain the taxonomic profiles, as described in reference 34. The primers and indices were removed by Cutadapt (version 2.2)35. Forward and reverse sequences of bacteria were cut to lengths 182 and 227 bp with the quality threshold of maxEE = c (1, 2) and truncQ =2, as calculated by Figaro software36. Forward and reverse sequences of archaea were cut to lengths 260 and 200 bp with the quality threshold of maxEE = 2 and truncQ =2. For determination of the relative contribution of the identified taxa, archaea sequences were excluded from the bacterial sequence library and bacteria sequences from the archaeal sequence library.

**Statistical analysis**

T.TEST was used for significance analysis, at least three technical replicates were used for all the experiments, and biological triplicates were performed. For the calculation of the ethanol concentration used for the rice treatment, the normal fresh weight of rhizosphere was ca. 500-1000 g from middle-stage growing rice, and with the water exchange method the volume of the rhizosphere was ca. 100 ml. Thus, as can be seen in Fig. 2a, the concentration of ethanol in fresh rhizosphere of SUSIBA2 rice was ca. 0.05 mg/g, which equalled ca. 5-10 mM ethanol concentration. For the calculation of fumarate concentration in the rhizosphere of the pot, the dry weight of rhizosphere was ca. 50-100 g, and based on the range of fumarate concentration with 0.2-0.54 mM/g in Fig. 1b, the corresponding concentration in the rhizosphere was 10-54 mM.

**Data availability**

All the data are available within this article and its Supplementary Information. Statistical analyses are provided in Source data provided with this paper. The original RNAseq data that support the findings of this study have been deposited and made publicly available in the ENA with accession code PRJNA758791. The NGS raw sequencing data are accessible via the National Center for Biotechnology Information (NCBI) database under BioProject ID PRJNA736597.

21. Rohnisch HE, Eriksson J, Müllner E, Agback P, Sandström C, Moazzami AA. AQuA: An Automated Quantification Algorithm for High-Throughput NMR-Based Metabolomics and Its Application in Human Plasma. *Anal Chem*. **90**, 2095-2102 (2018).

22. CoulombM, Gombert A, Moazzami AA. Metabolomics study of cereal grains reveals the discriminative metabolic markers associated with anatomical compartments. *IJSF*. **27**, 1-9 (2015).

23. Jin, Y. et al. A Dual-Promoter Gene Orchestrates the Sucrose-Coordinated Synthesis of Starch and Fructan in Barley. *Mol. Plant* **10**, 1556-1570 (2017).

24. Martin, M. Cutadapt removes adapter sequences from high-throughput sequencing reads. *EMBnet.J.* **17**, 10-12 (2011).

25. Dobin, A. et al. STAR: ultrafast universal RNA-seq aligner. *Bioinformatics* **29**:15-21 (2013).

26. Durinck, S., Spellman, P.T., Birney, E., & Huber, W. Mapping identifiers for the integration of genomic datasets with the R/Bioconductor package biomaRt. *Nat Protoc*. **4**, 1184-1191 (2009).

27. Westerholm, M.et al.Quantification of syntrophic acetate-oxidizing microbial communities in biogas processes. *Environ. Microbiol. Rep*.**3**,500–505 (2011).

28. Narihiro, T. & Sekiguchi, Y. Oligonucleotide primers, probes and molecularmethods for the environmental monitoring of methanogenic archaea. *Microb.Biotechnol.* **4**, 585–602 (2011).

29. Poehlman, J.M. & Sleper, D.A. Breeding Field Crops (Fourth Edition). Ames, USA: lowa State University Press, Ames, Iowa (1995).

30. Westerholm. M., Roos. S. & Schnürer. A. Syntrophaceticus schinkii gen. nov., sp. nov., an anaerobic, syntrophic acetate-oxidizing bacterium isolated from a mesophilic anaerobic filter. *FEMS Microbiol Lett*. **309**, 100-104 (2010).

31. Liu. T., Sun. L, Müller. B. & Schnürer. A. Importance of inoculum source and initial community structure for biogas production from agricultural substrates. *Bioresour Technol*. **245**, 768-777 (2017).

32. Hugerth, L.W. et al. DegePrime, a program for degenerate primer design for broad-taxonomic-range PCR in microbial ecology studies. *Appl Environ Microbiol*. **80**, 5116–5123 (2014).

33. Takai, K. & Horikoshi, K. Rapid detection and quantification of members of the archaeal community by quantitative PCR using fluorogenic probes. *Appl Environ Microbiol*. **66,** 5066–5072 (2000).

34. Westerholm, M., Isaksson, S., Karlsson, L.O. & Schnürer, A. Microbial community adaptability to altered temperature conditions determines the potential for process optimisation in biogas production, *Applied Energy* **226**, 838-848 (2018).

35. Martin, M. Cut adapt removes adapter sequences from high-throughput sequencing reads. *EMBnet J*. **17**:10–12 (2011).

36. Weinstein, M.M., Prem, A., Jin, M., Tang, S. & Bhasin, J.M. FIGARO: An efficient and objective tool for optimizing microbiome rRNA gene trimming parameters, *BioRxiv*, 2019.

**Acknowledgements**

We thank Prof. Jinsong Bao, Prof. Wenfu Chen, Prof. Zhengjin Xu, Prof. Huaibing Li, Prof. Feng Wang and Dr. Dianrong Ma for providing the rice lines to screen low-methane rice and elite rice for breeding. We thank NBIS, Sweden AB for RNAseq and bioinformatic analysis. We thank Simon Isaksson for methane analysis. We thank Jens Sundström for the seed available application. We thank Zhenxing Wang for the assistant of bioinformatic analysis. This research was funded by Mr. Zheng Fang, Beijing Xianhe Transportation Technology Co. Ltd.; Trees and Crops for the Future (TC4F); the Swedish Research Council for Environment, Agricultural Sciences and Spatial Planning (FORMAS; project no. 219-2014-1172 and 2020-01327); Jia Hu obtained a stipend from the China Scholarship Council (file no. 201708430115).

**Author contributions**

C.S. and A.S. designed the research; Y.J. performed methane collection, metabolites analysis, fumarate, oxantel and ethanol treatment in the phytotron, root secretion assay, arrangement of field trials. T.L. performed all the NGS and *in vitro* experiment. J.H. performed soil DNA isolation and methanogens analysis, methane collection, low-methane rice screening, rice breeding and progenies screening, root secretion and metabolites analysis. K.S., X.Y., PF.H., and L.X. organised and performed field trials. M.B. performed methane collection. A.M. performed NMR analysis. J.T., PY.H., Z.Y., C.L., P.L., A.P., L.W. and G.X. performed field trials. Y.J., T.L. and J.H. wrote the paper, and A.S. revised the paper.

**Competing interests**

The authors declare no competing interests.

**Additional information**

**Supplementary information** The online version contains supplementary material available at <https://xxxxx>

**Correspondence and requests for materials** should be addressed to C.S. orA.S.

**Supplementary data**


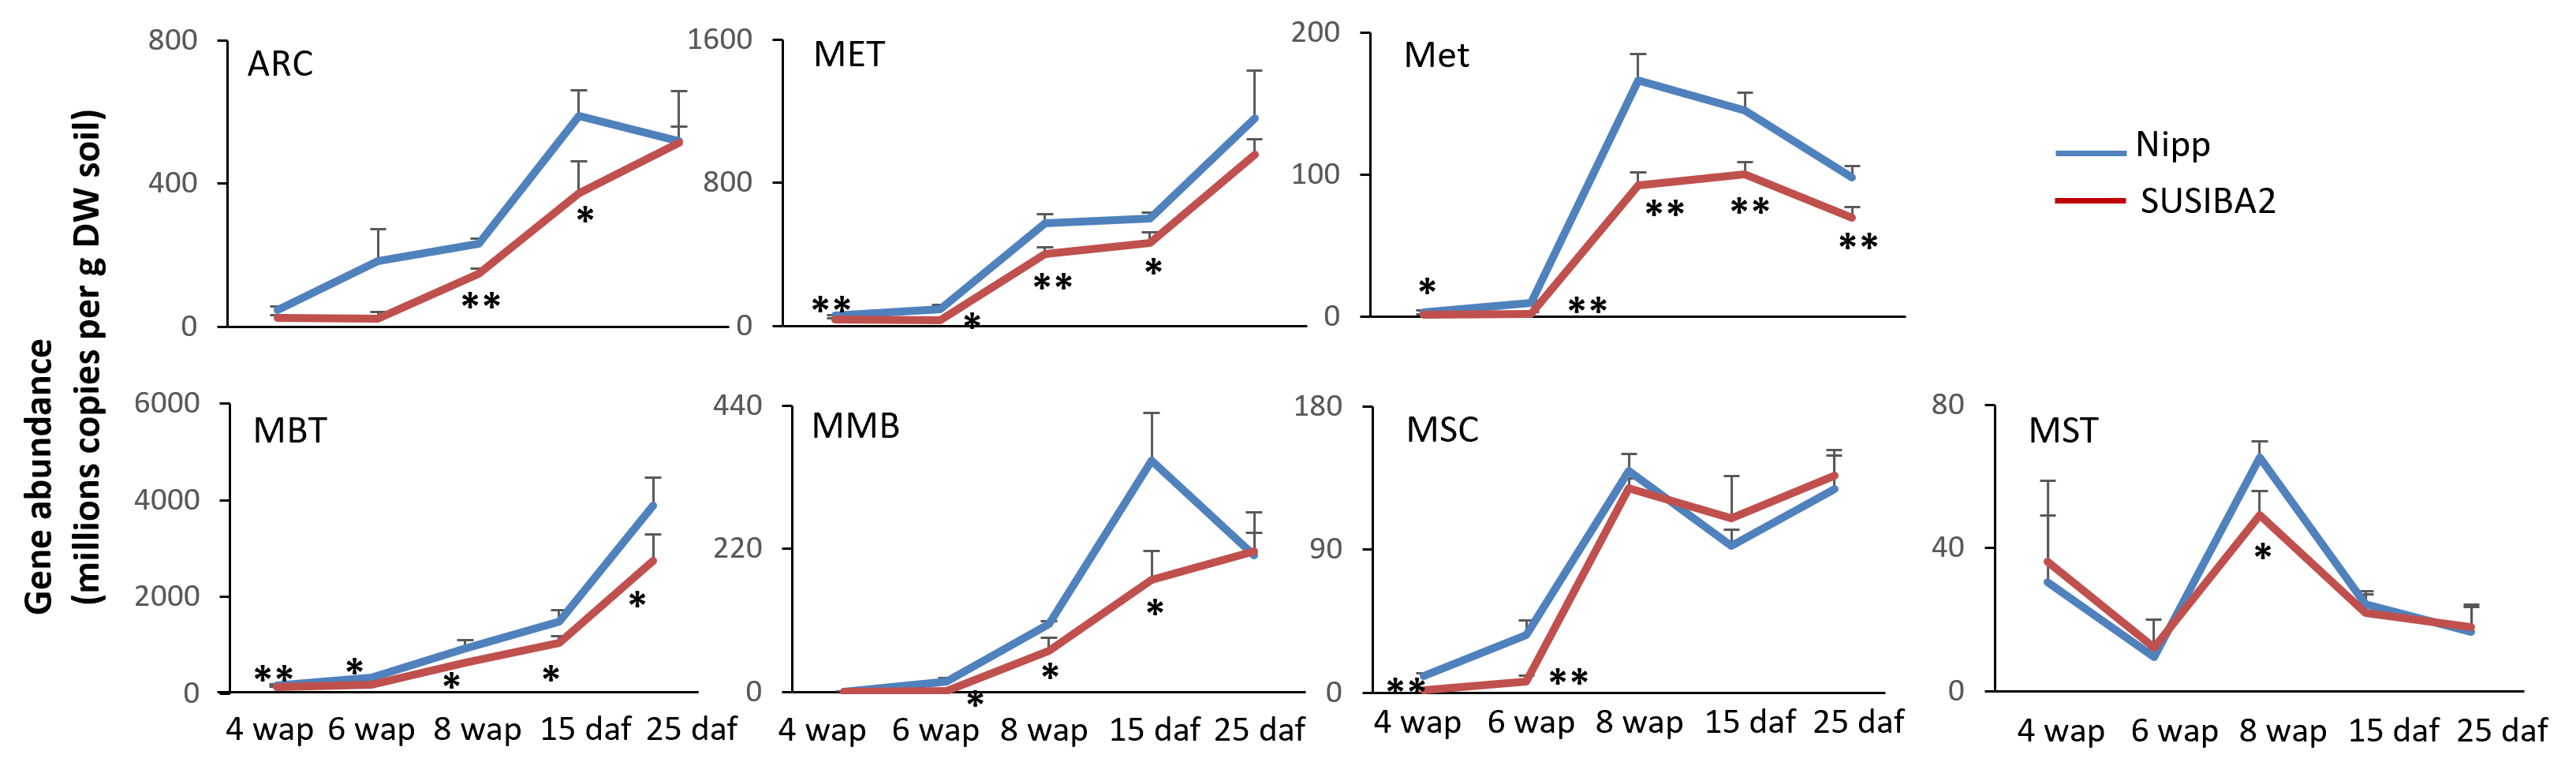


**Supplementary Fig. 1│Profile of seasonal methanogenic abundance**

Quantification of methanogens in rhizospheric soil from three plants each of Nipp and SUSIBA2. Rhizospheric soil was sampled from 5 cm depth and 5 cm from the rice plant. The experiment in this figure was repeated three times with similar trends. T.TEST was used, ***P* ≤ 0.01 or **P* ≤ 0.05, error bars show s.d. wap: week after planting, daf: day after flowering.


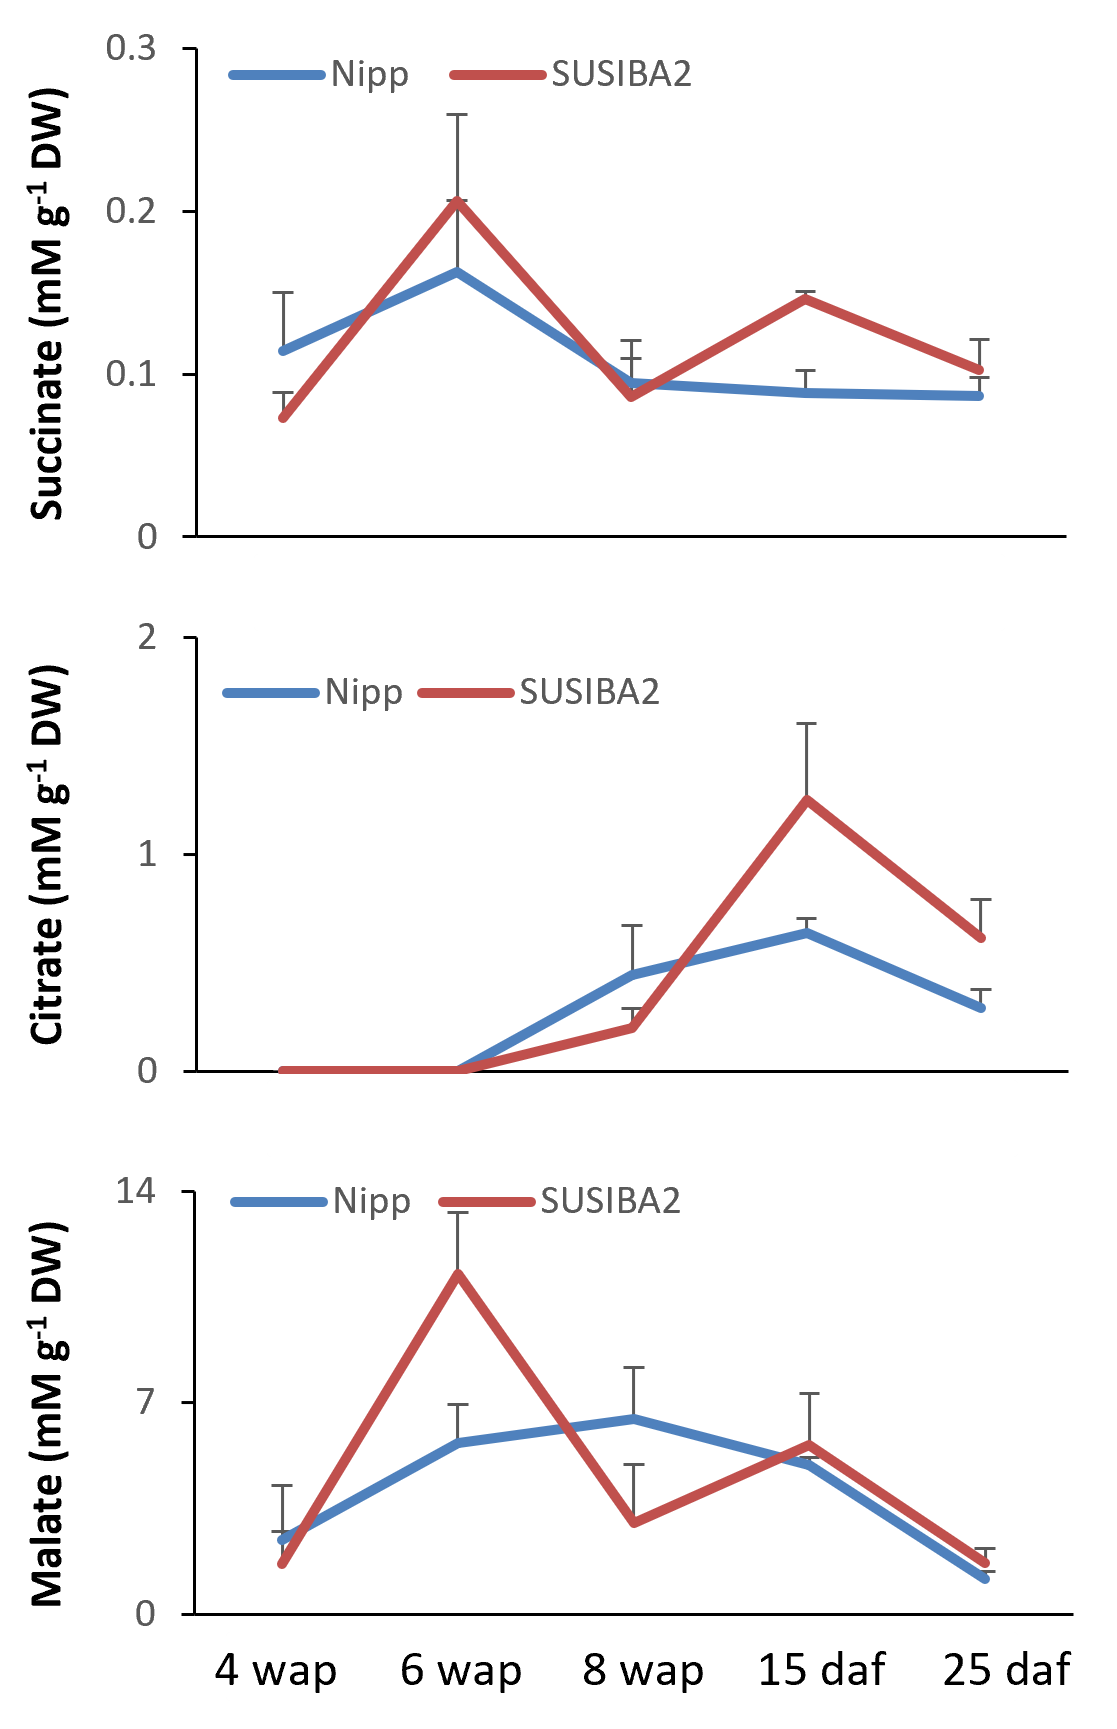
**Supplementary Fig. 2│Illustration of seasonal component analysis of rhizospheric soil from Nipp and SUSIBA2 rice**

Seasonal concentration of succinate, citrate and malate from the rhizosphere and the difference between Nipp and SUSIBA2 rice. wap: week after planting, daf: day after flowering. Three plants were used, and experiment in this figure was repeated three times with similar trends. Error bars show s.d.


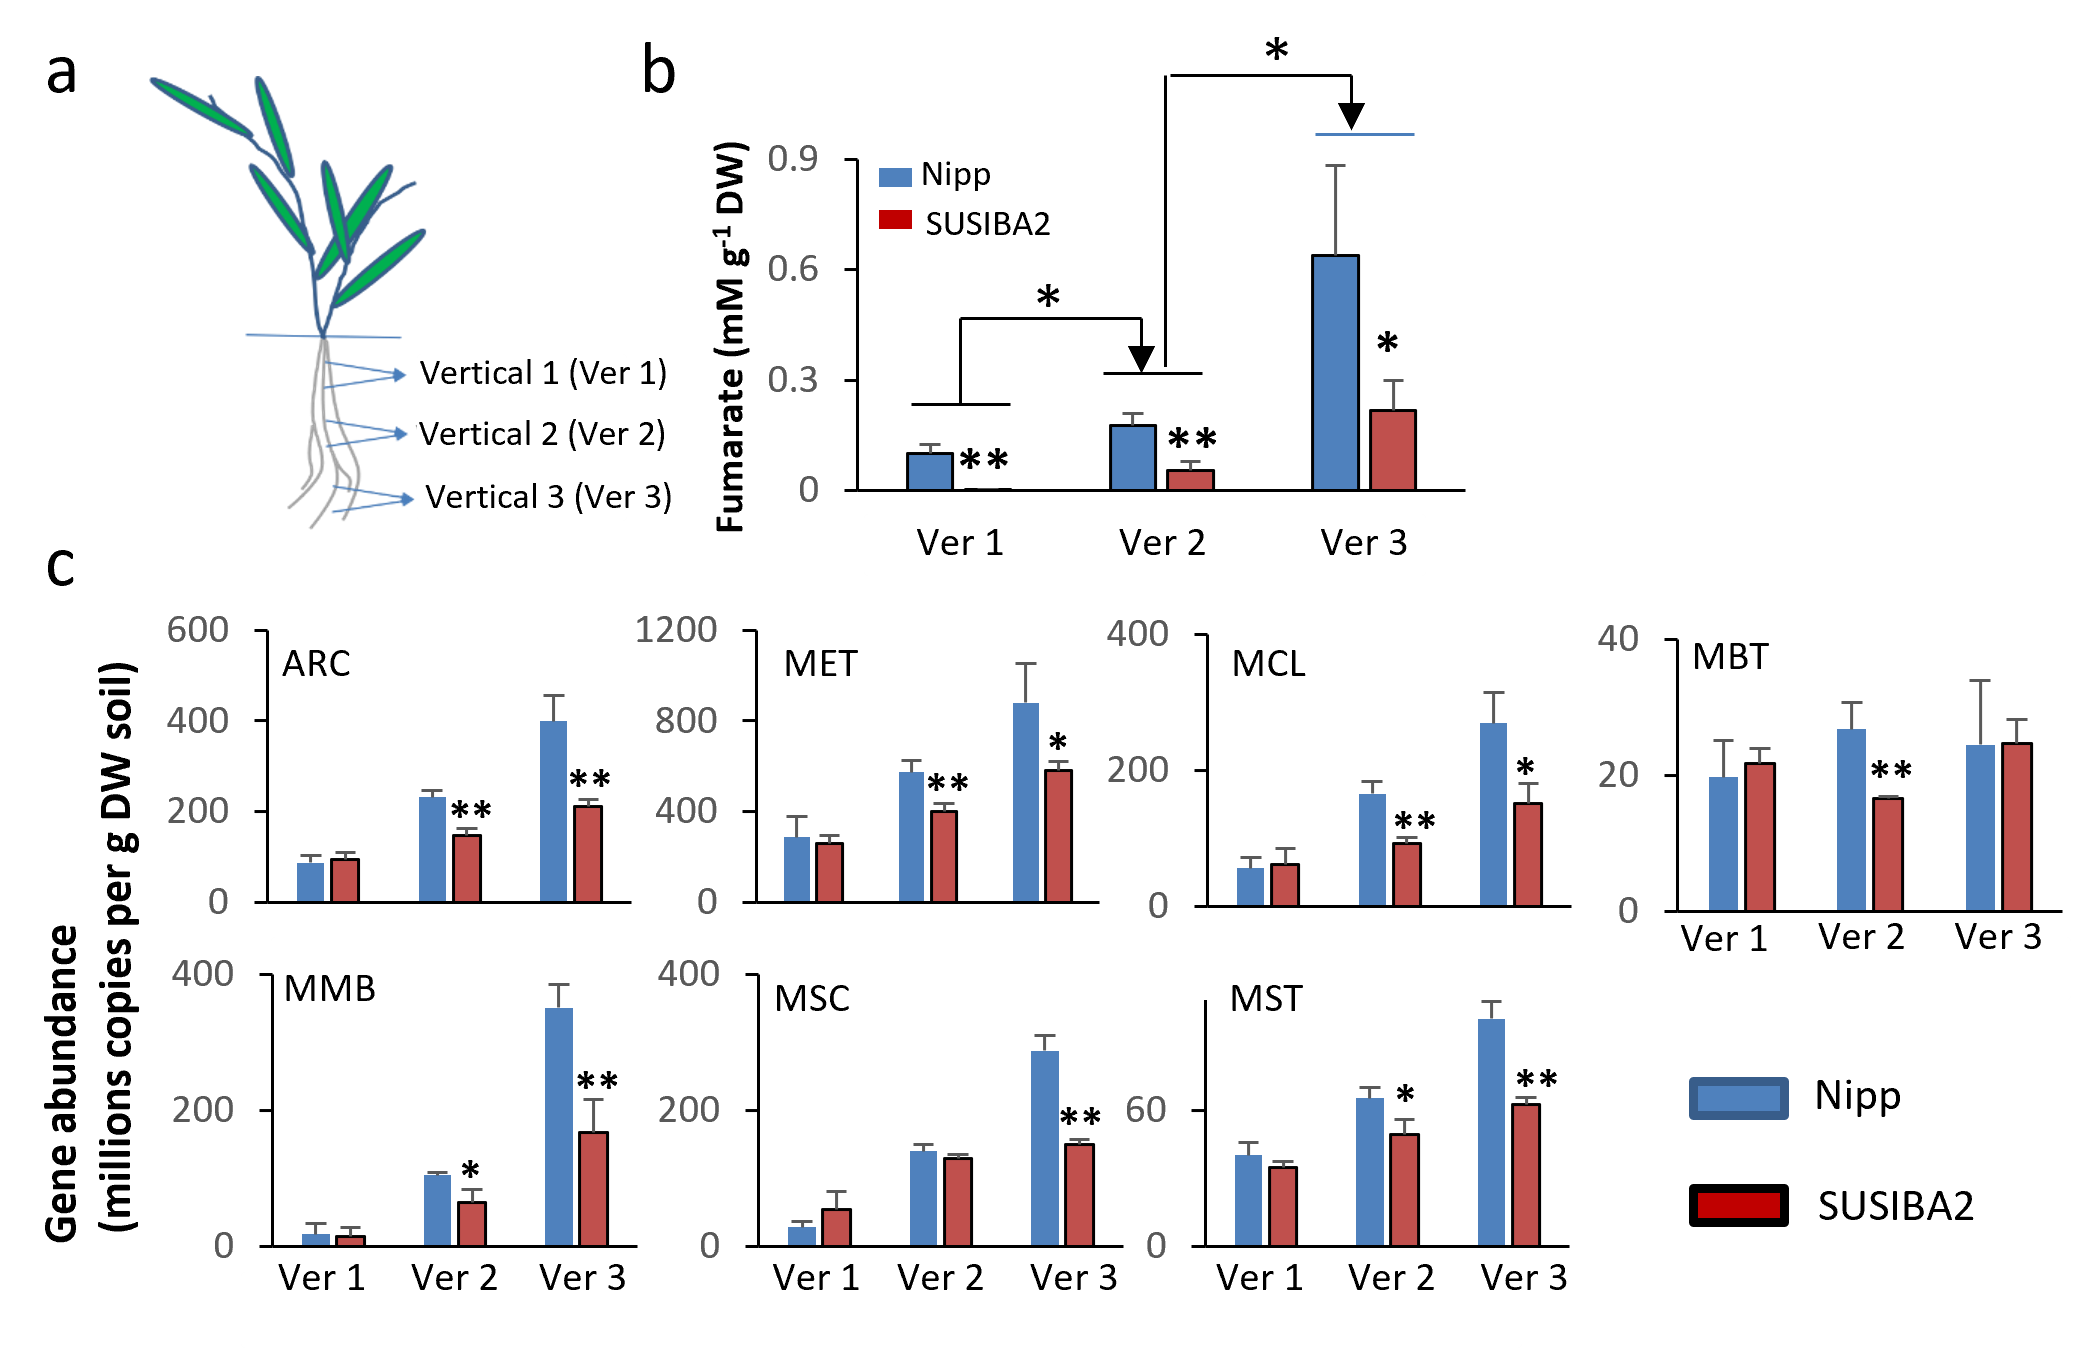


**Supplementary Fig. 3│Distribution analysis of fumarate and methanogens from the vertical position**

a, Depiction of sampling from the vertical position

b, Distribution of fumarate in rhizosphere from Ver 1, Ver 2 and Ver 3

c, Quantification of methanogens in rhizosphere from Ver 1, Ver 2 and Ver 3. Seven pairs of primers (Supplementary Table 1) were used for the quantification

Difference between Nipp and SUSIBA2 were statistically significant for both methanogenic abundance and fumarate levels (b and c). For fumarate a significant difference were also observed between vertical 2 and vertical 1 and between vertical 3 and vertical 2 for both Nipp and SUSIBA (b). Three rice plants of 8 wap were used, and experiments in this figure were repeated three times with similar trends. T.TEST was used, ***P* ≤ 0.01 or **P* ≤ 0.05, error bars show s.d. Vertical 1/2/3: Ver 1/2/3.


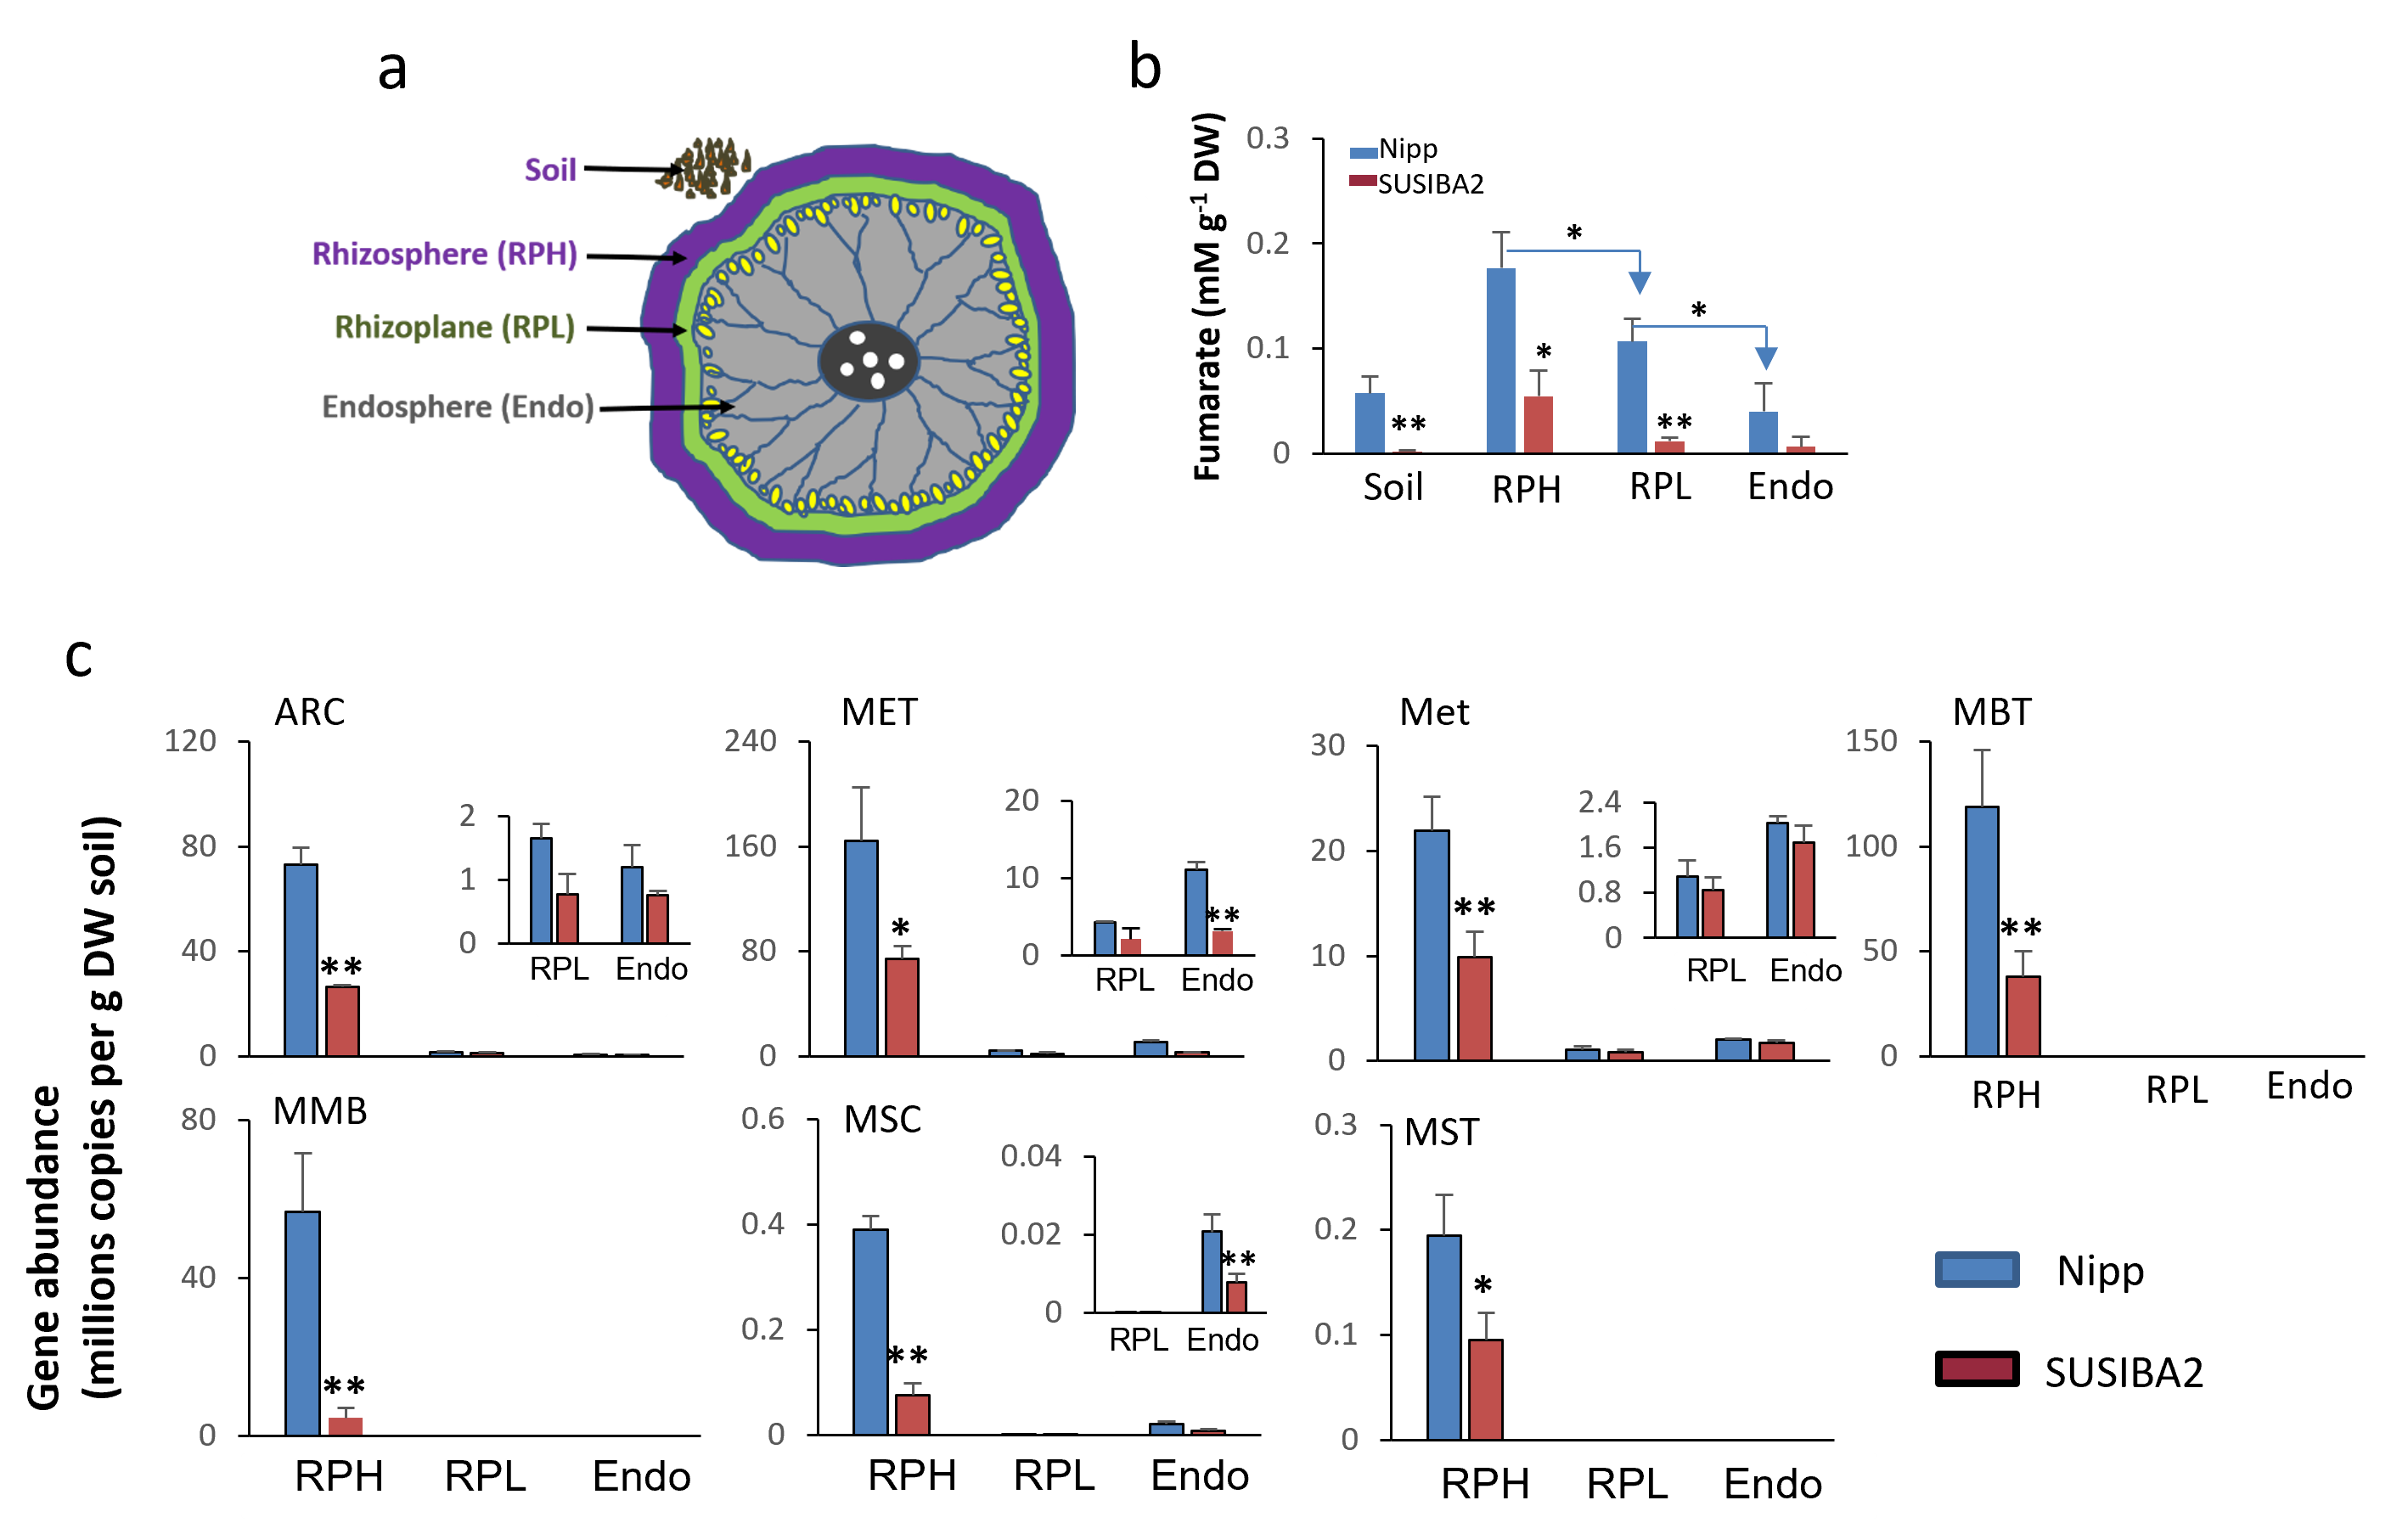


**Supplementary Fig. 4│Distribution analysis of fumarate and methanogenic from horizontal position**

a, Depicting of sampling position from the horizontal position

b, Distribution of fumarate in soil, RPH, RPL and Endo respectively

c, Quantification of methanogens from RPH, RPL and Endo. Seven pairs of primers (Supplementary Table 1) were used for the quantification

Difference between Nipp and SUSIBA2 were statistically significant for both methanogenic abundance and fumarate levels (b and c). The levels of fumarate were also significantly different between RPL and RPH and between Endo and RPL (b). Three plants of 8 wap were used, and experiments in this figure were repeated three times with similar trends. Rhizosphere including root were sampled from 5 cm depth and 5 cm away from the rice plant. T.TEST was used, ***P* ≤ 0.01 or **P* ≤ 0.05, error bars show s.d. Rhizosphere: RPH, Rhizoplane: RPL, Endosphere: Endo


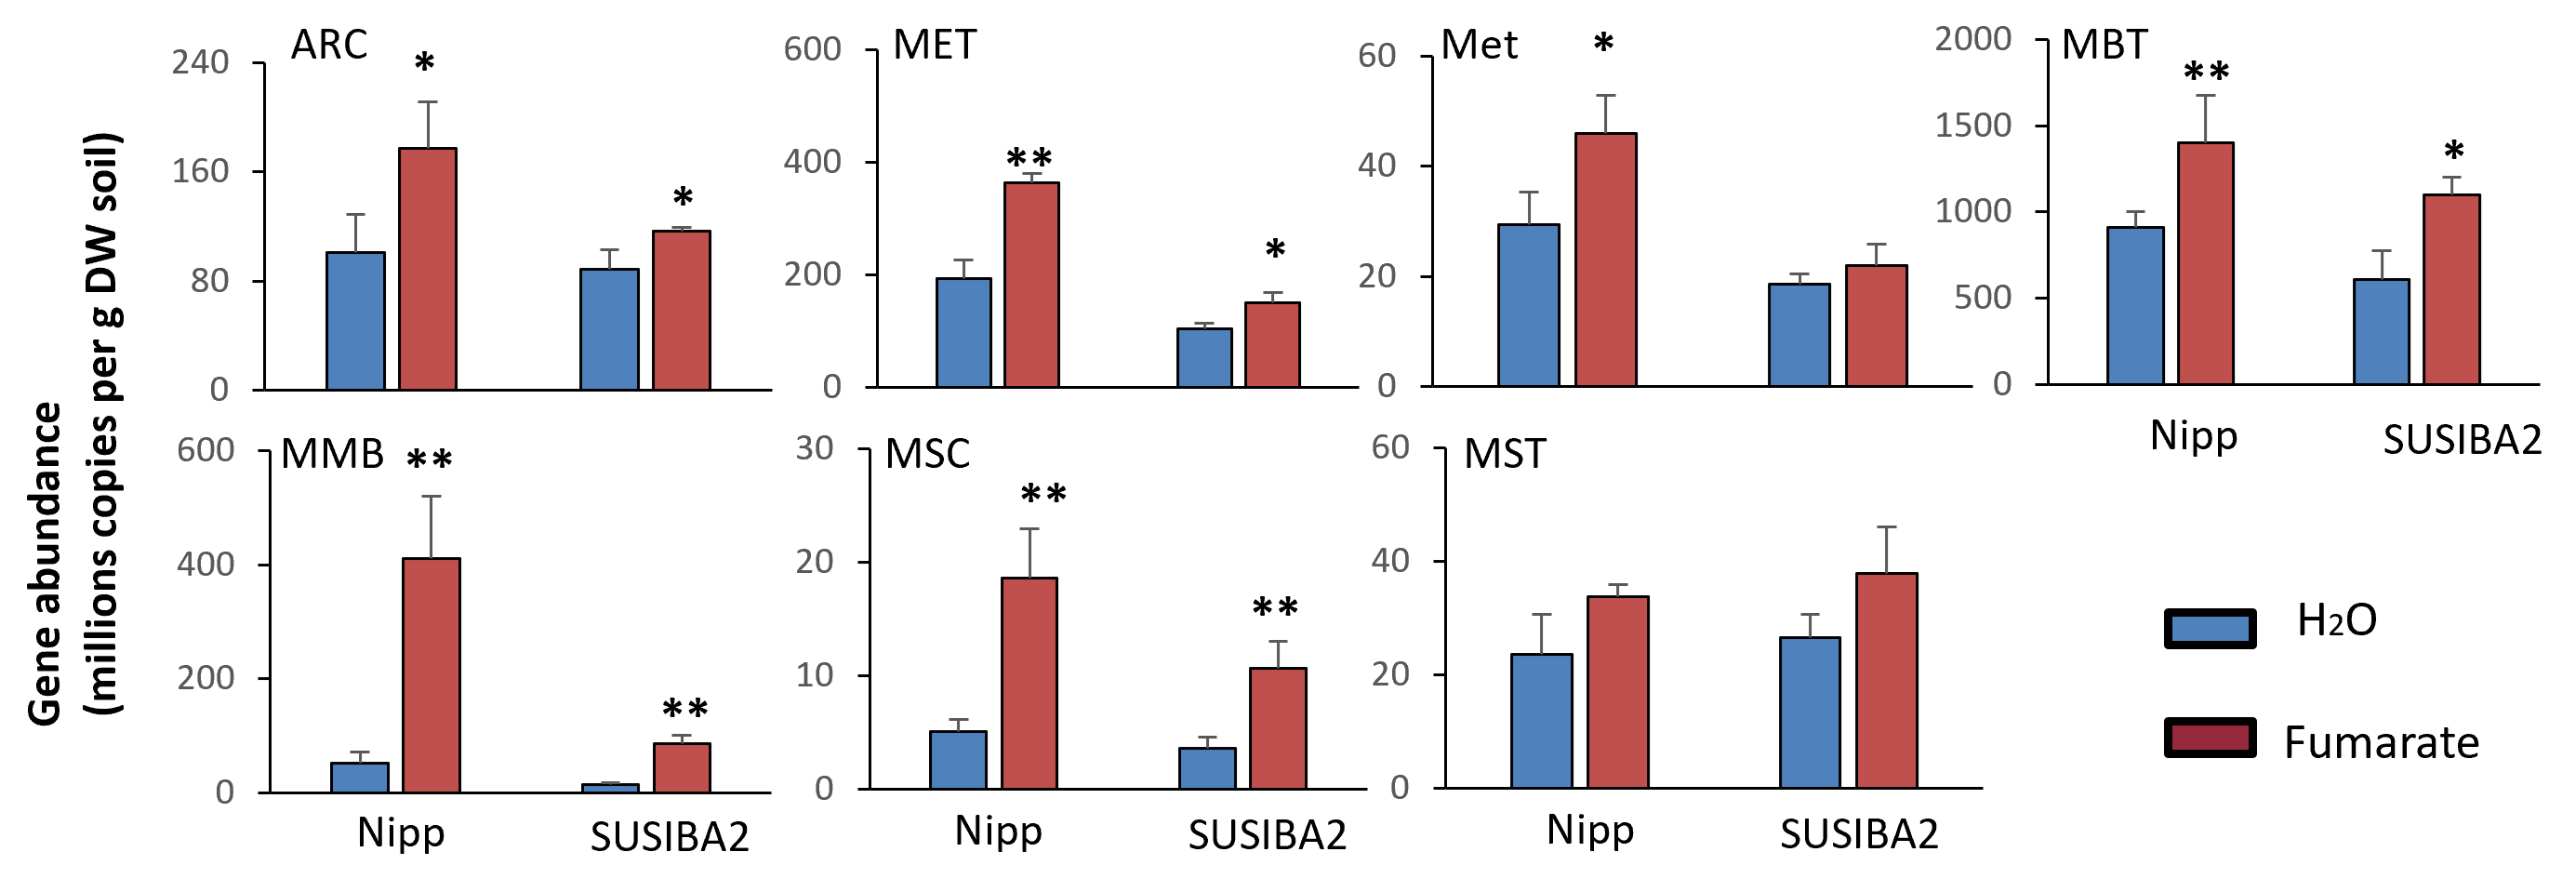


**Supplementary Fig. 5│qPCR quantification of rhizospheric methanogenic communities associated with fumarate treatment in a phytotron**

Samples from 5 cm depth and 5 cm away from the rice plant were collected, rhizospheric soil including root was used for DNA extraction and methanogenic community analysis. Seven pairs of primers (Supplementary Table 1) were used for the quantification. Three plants were used, and the experiment represented in this figure was repeated three times with similar trends. T.TEST were used, ***P* ≤ 0.01 or **P* ≤ 0.05, error bars show s.d.


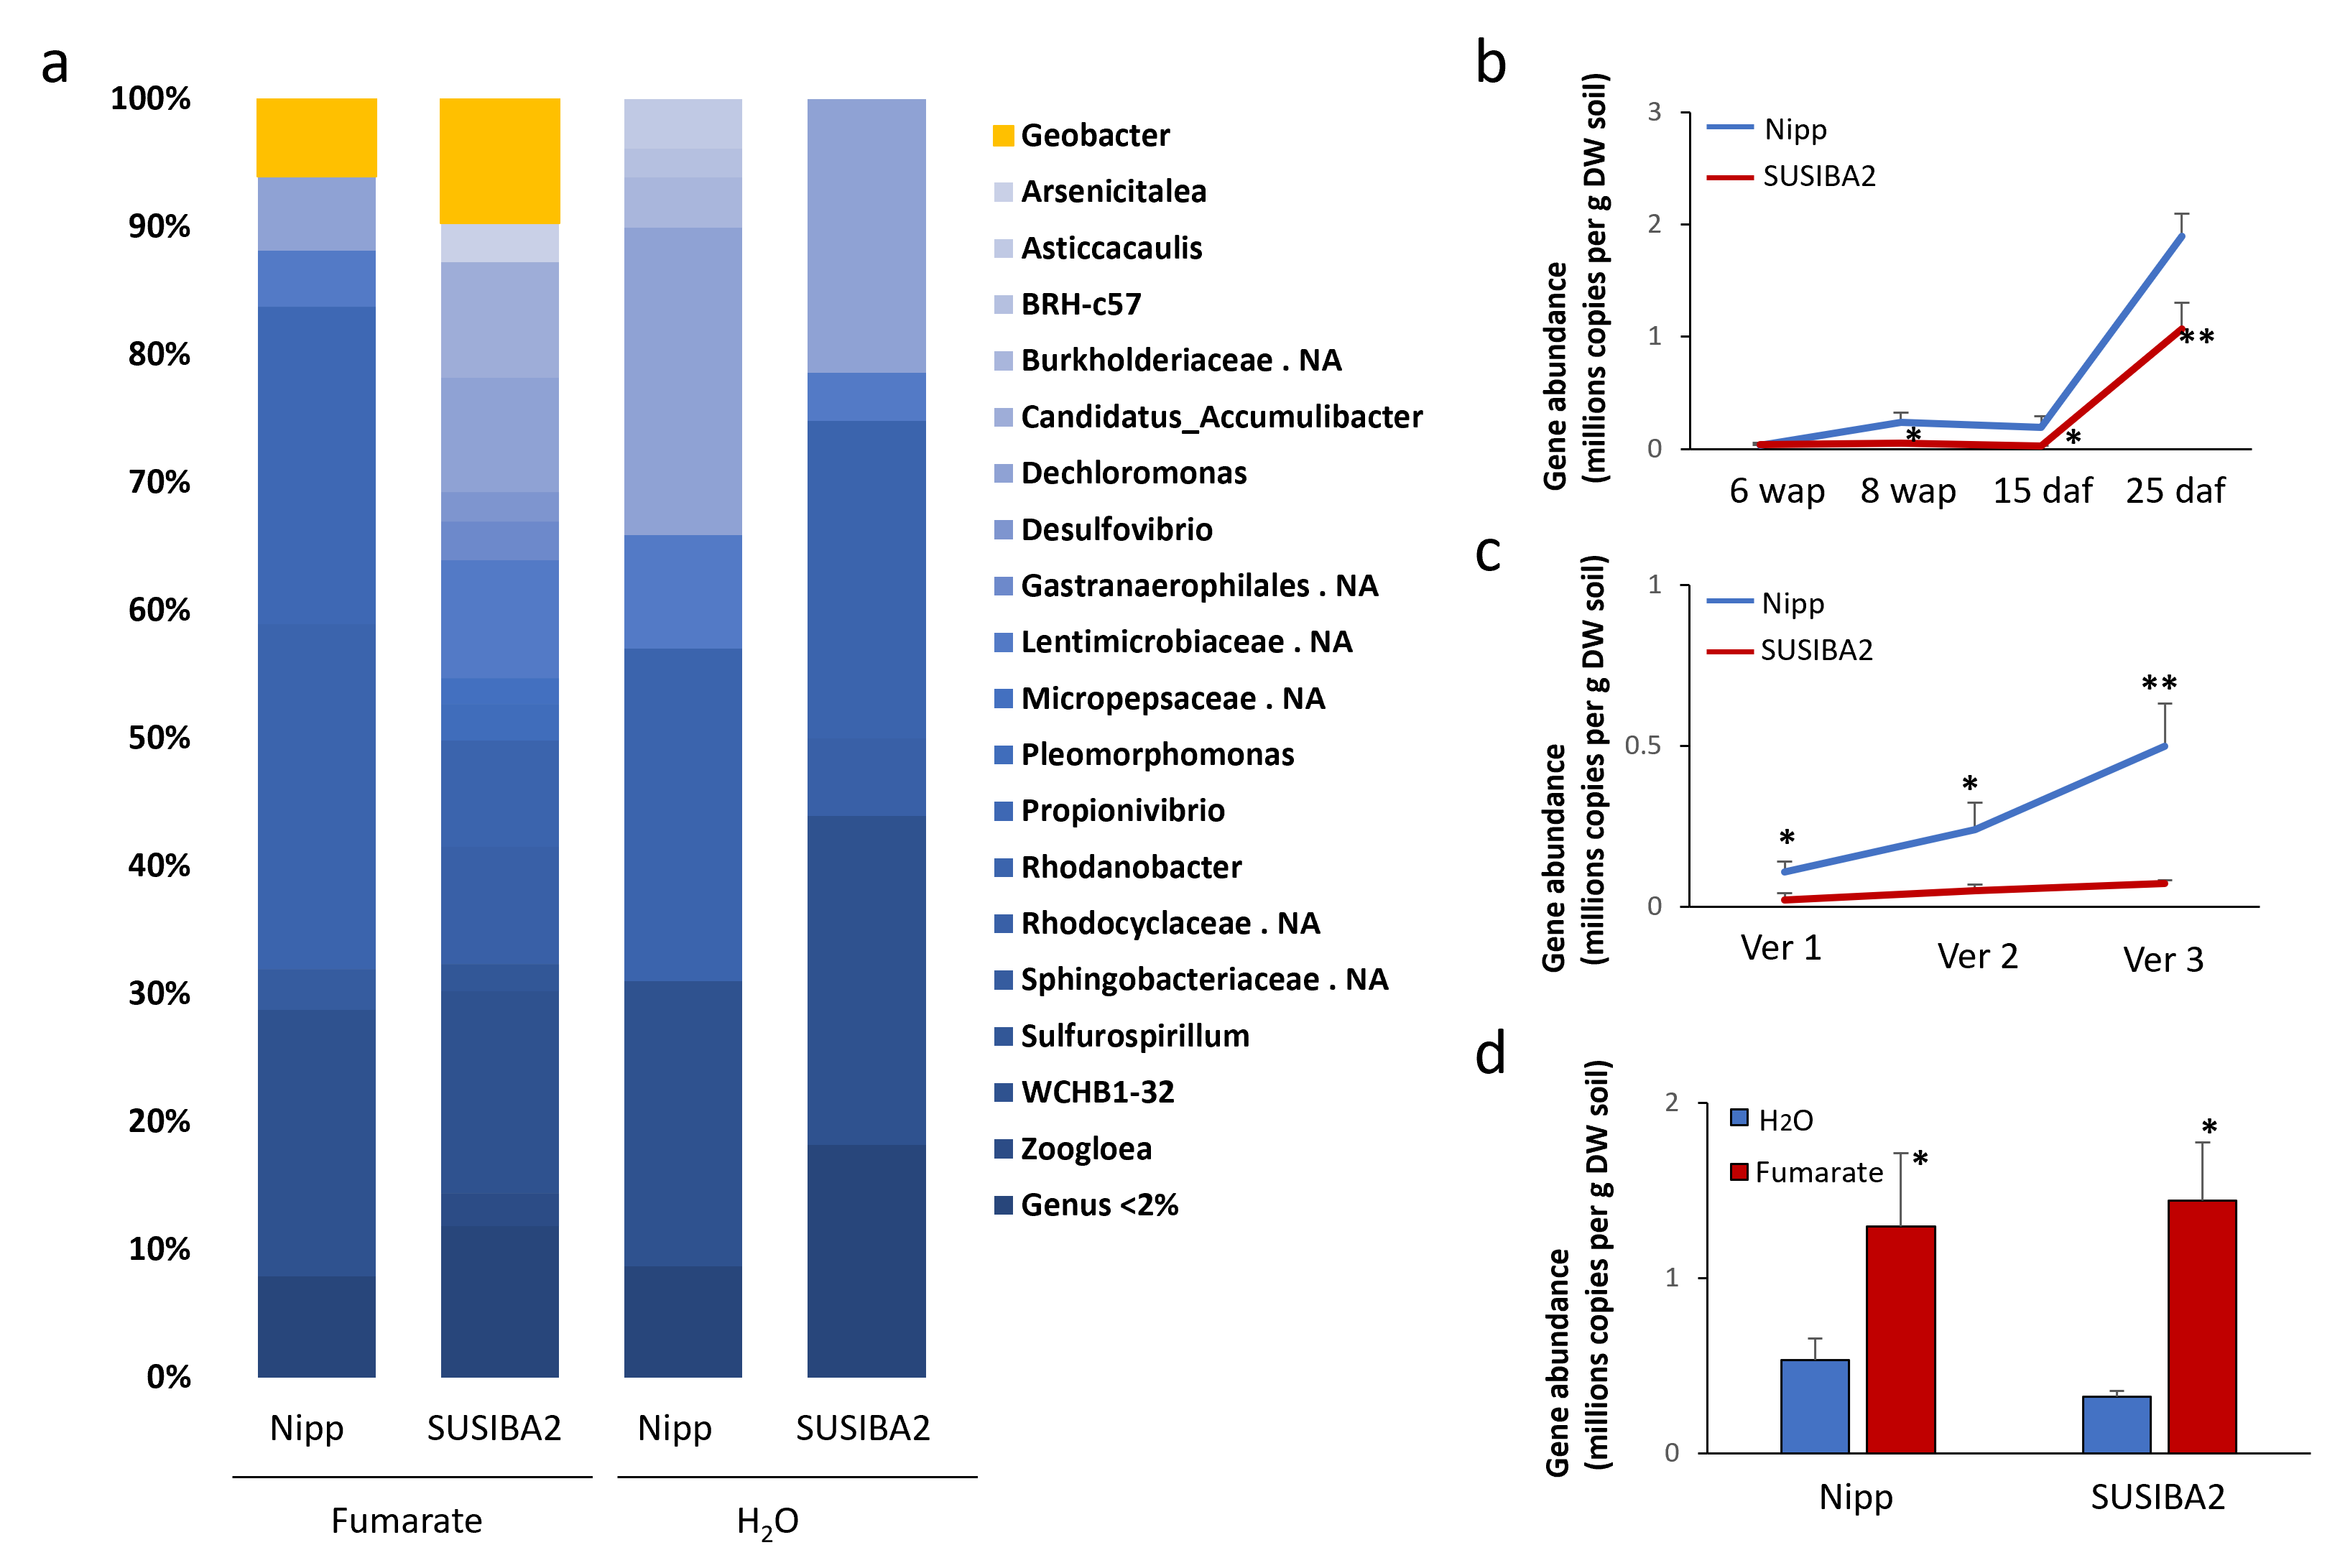


**Supplementary Fig. 6│The response of the bacterial community to fumarate treatment in the phytotron and the specific display of *Geobacter***

a, Relative abundance of the bacterial community based on the average ASV reads of 16S rRNA genes from triplicates Nipp and SUSIBA2 rice pot rhizospheric soil samples with or without fumarate treatment. Where genus names could not be assigned (NA) to the sequences, the closest classified taxonomic level is presented.Geobacter is highlighted in yellow

b, Copy number of *G*. *sulfurreducens* in the rhizosphere during seasonal rice developmental stages

c, Copy number of *G*. *sulfurreducens* in the vertical positions of the rhizosphere (Supplementary Fig. 3) in Nipp and SUSIBA2 rice

d, Copy number of *G*. *sulfurreducens* with the fumarate treatment (same samples with Supplementary Figure 5) in Nipp and SUSIBA2 rice respectively

The significance between Nipp and SUSIBA2 were statistically analysed (b and c) and a significant difference was seen between H2O and the fumarate treatment (d). Three plants were used, and experiments in b-d were repeated three times with similar trends. T.TEST was used, ***P* ≤ 0.01 or **P* ≤ 0.05, error bars show s.d. wap: week after planting, Ver 1/2/3: Vertical 1/2/3, ASV: Amplicon Sequence Variants


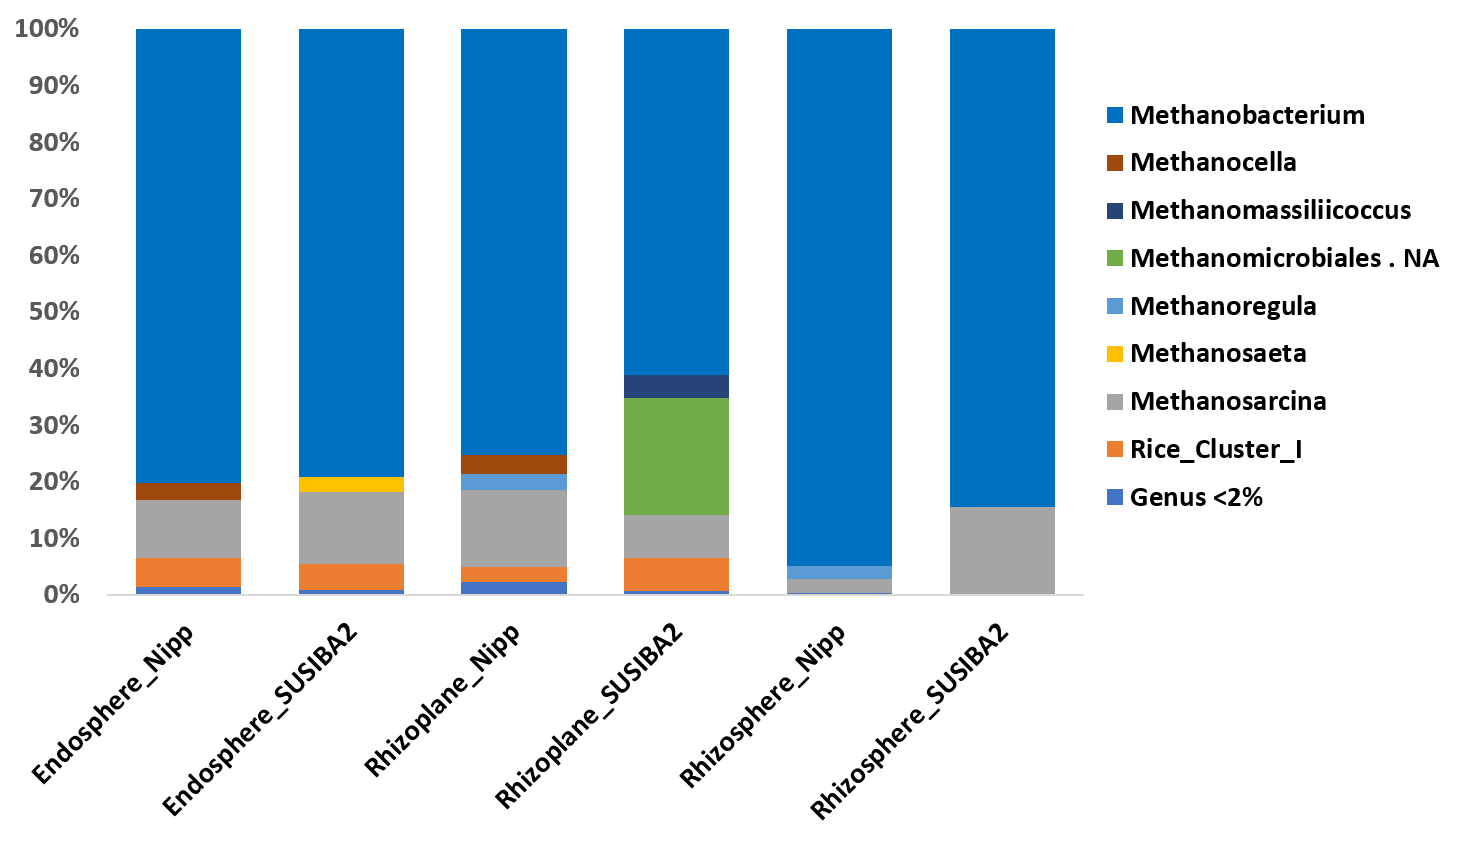


**Supplementary Fig. 7│Relative abundance of methanogenic community targeting 16S rRNA genes on genus level, as described in Extended Figure 4a**

Rhizosphere, rhizoplane, and endosphere samples from three plants each of Nipp and SUSIBA2 rice in the phytotron were pooled and used for microbial analyses.


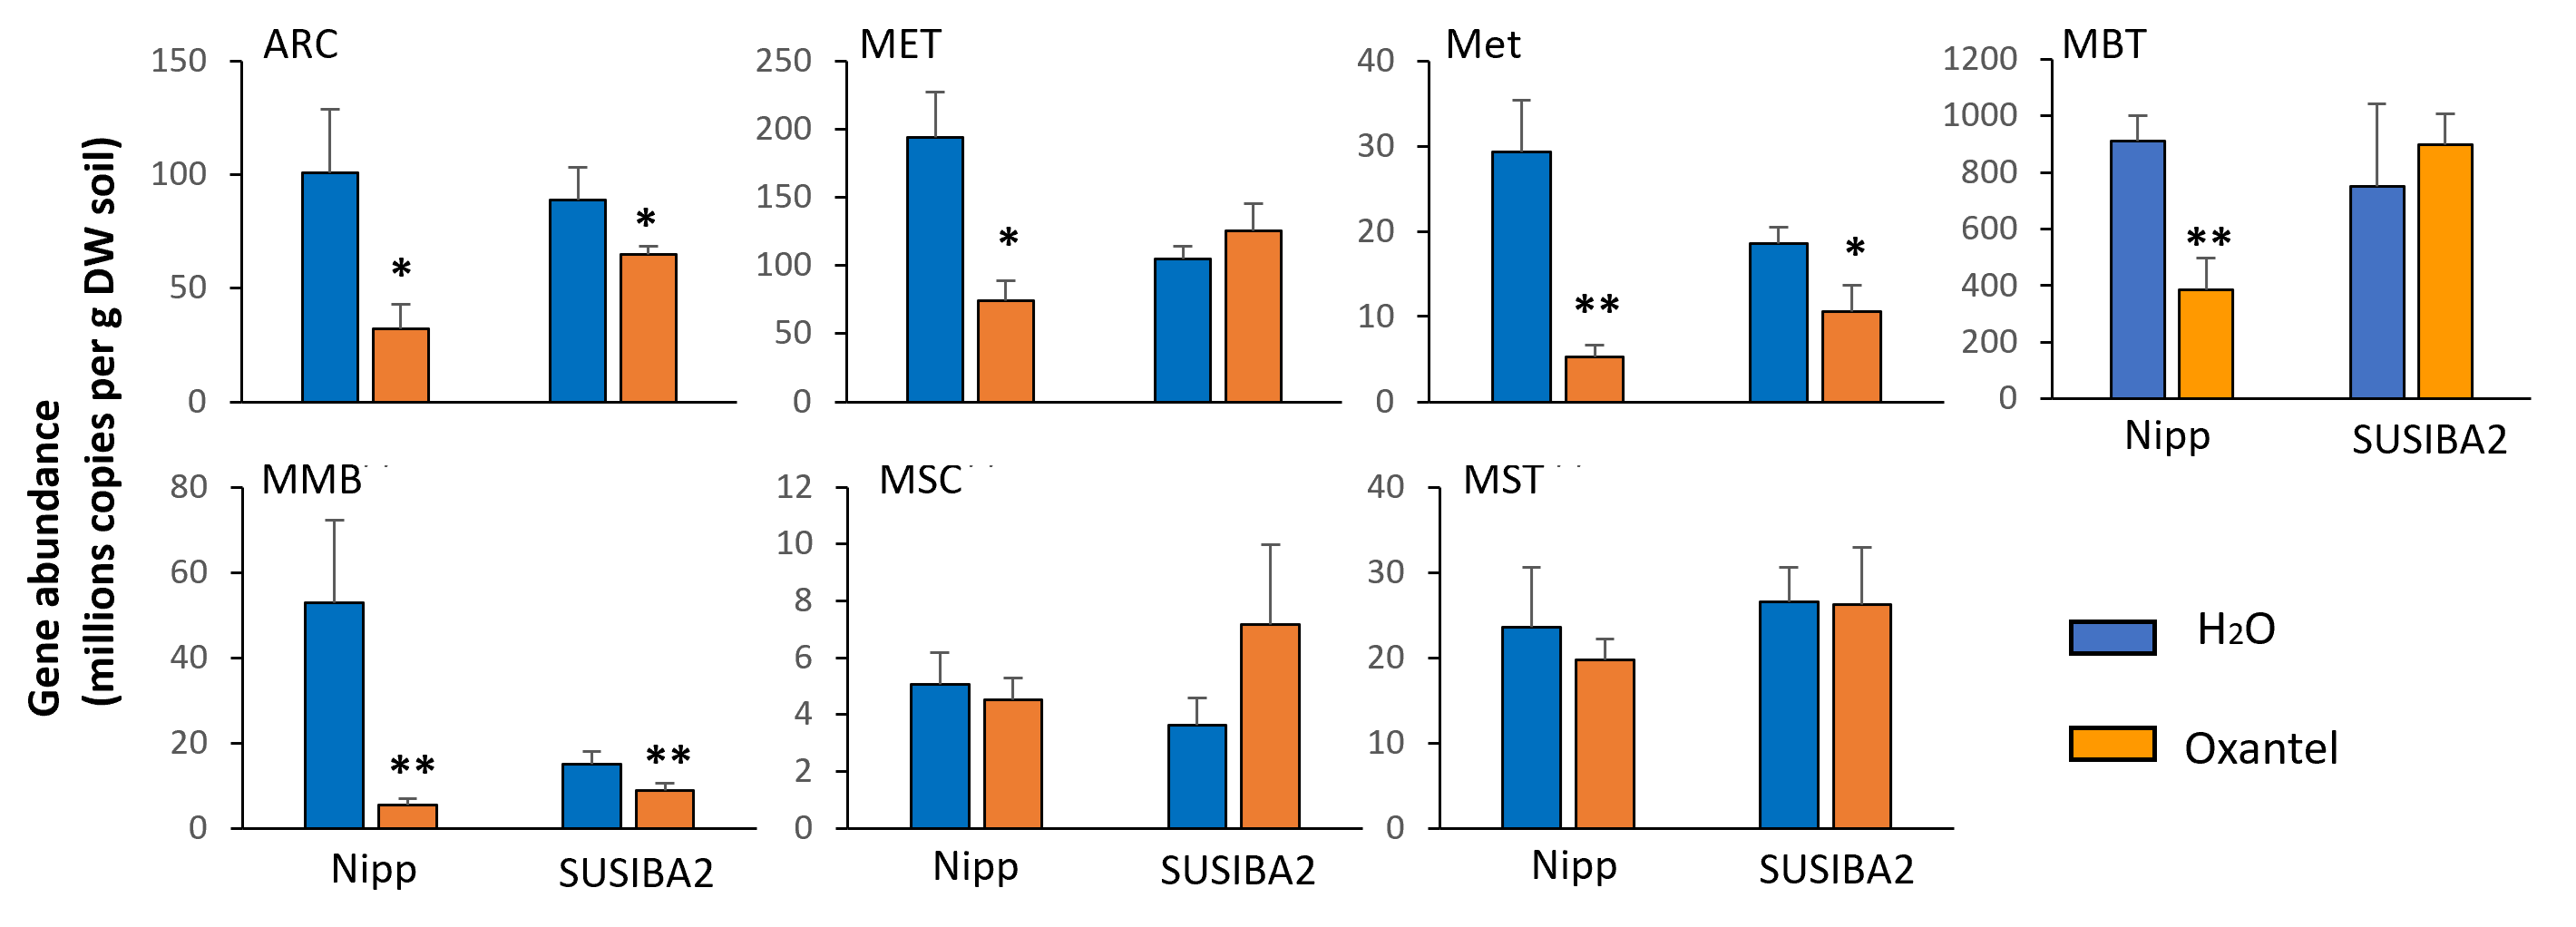


**Supplementary Fig. 8│qPCR quantification of rhizospheric methanogenic communities associated with oxantel treatment in the phytotron**

Samples from 5 cm depth and 5 cm away from the rice plant were collected, rhizospheric soil including roots was used for DNA extraction, and isolated DNA was used for methanogenic community analysis. Seven pairs of primers (Supplementary Table 1) were used for the quantification. Three plants were used, and the experiment in this figure was repeated three times with similar trends. T.TEST was used, ***P* ≤ 0.01 or **P* ≤ 0.05, error bars show s.d.


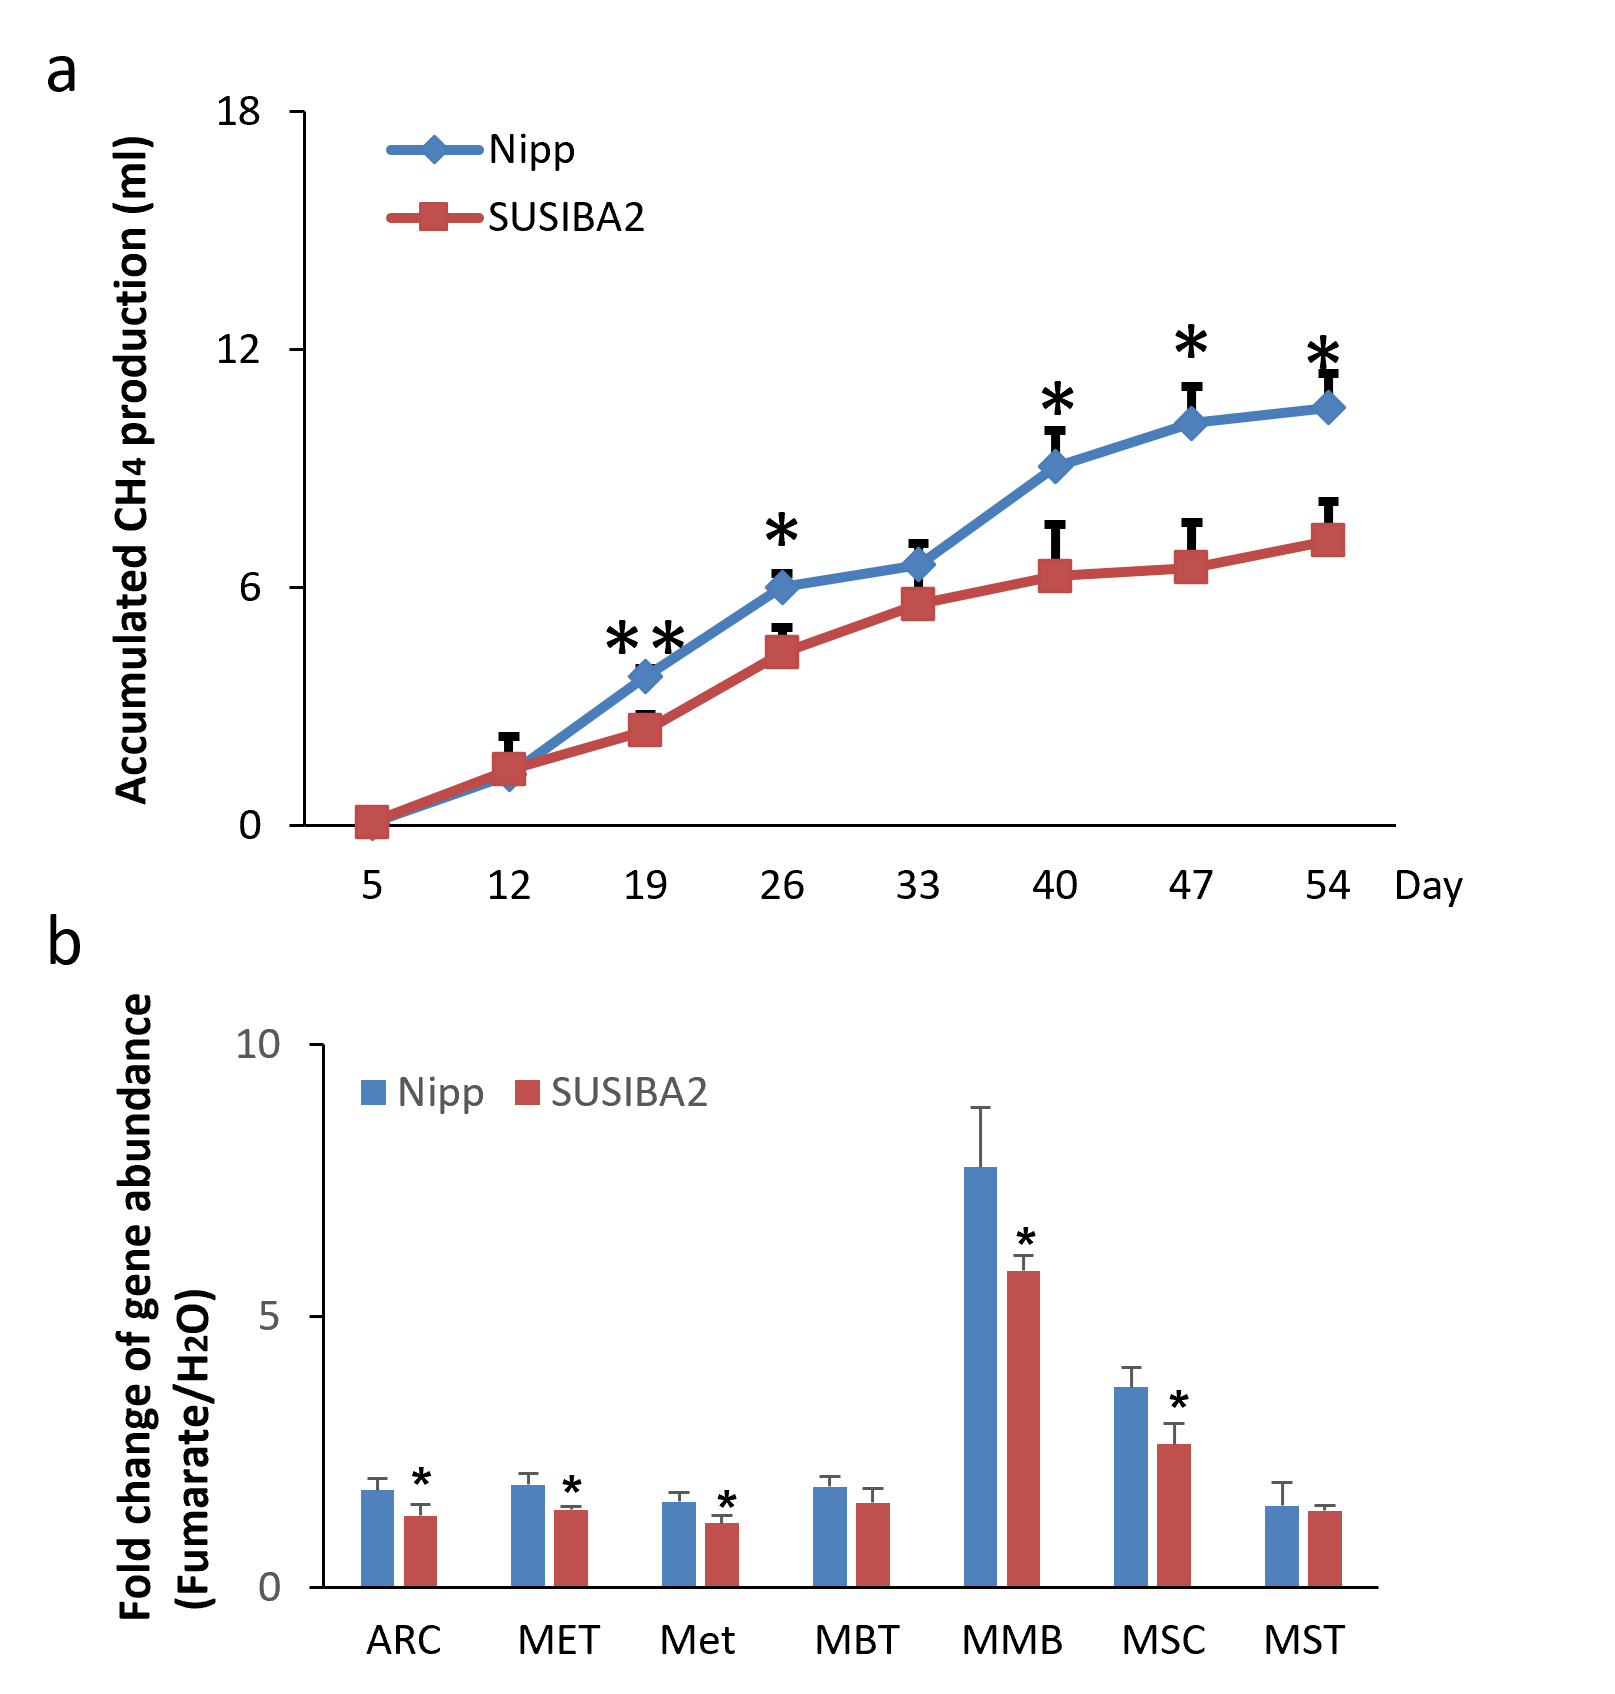


**Supplementary Fig. 9│Sensitive analysis of methanogens and methane emission to fumarate treatment in Nipp and SUSIBA2 rice.**

a, Comparison of accumulated methane production from enrichment culture using fresh rhizospheric soil from Nipp and SUSIBA2 rice with fumarate treatment

b, Fold change comparison of methanogen abundance between Nipp and SUSIBA2 rice with fumarate treatment in the phytotron

Difference between Nipp and SUSIBA2 was statistically significant. T.TEST was used, ***P* ≤ 0.01 or **P* ≤ 0.05, error bars show s.d. Three plants were used, and the experiments in this figure were repeated three times with similar trends


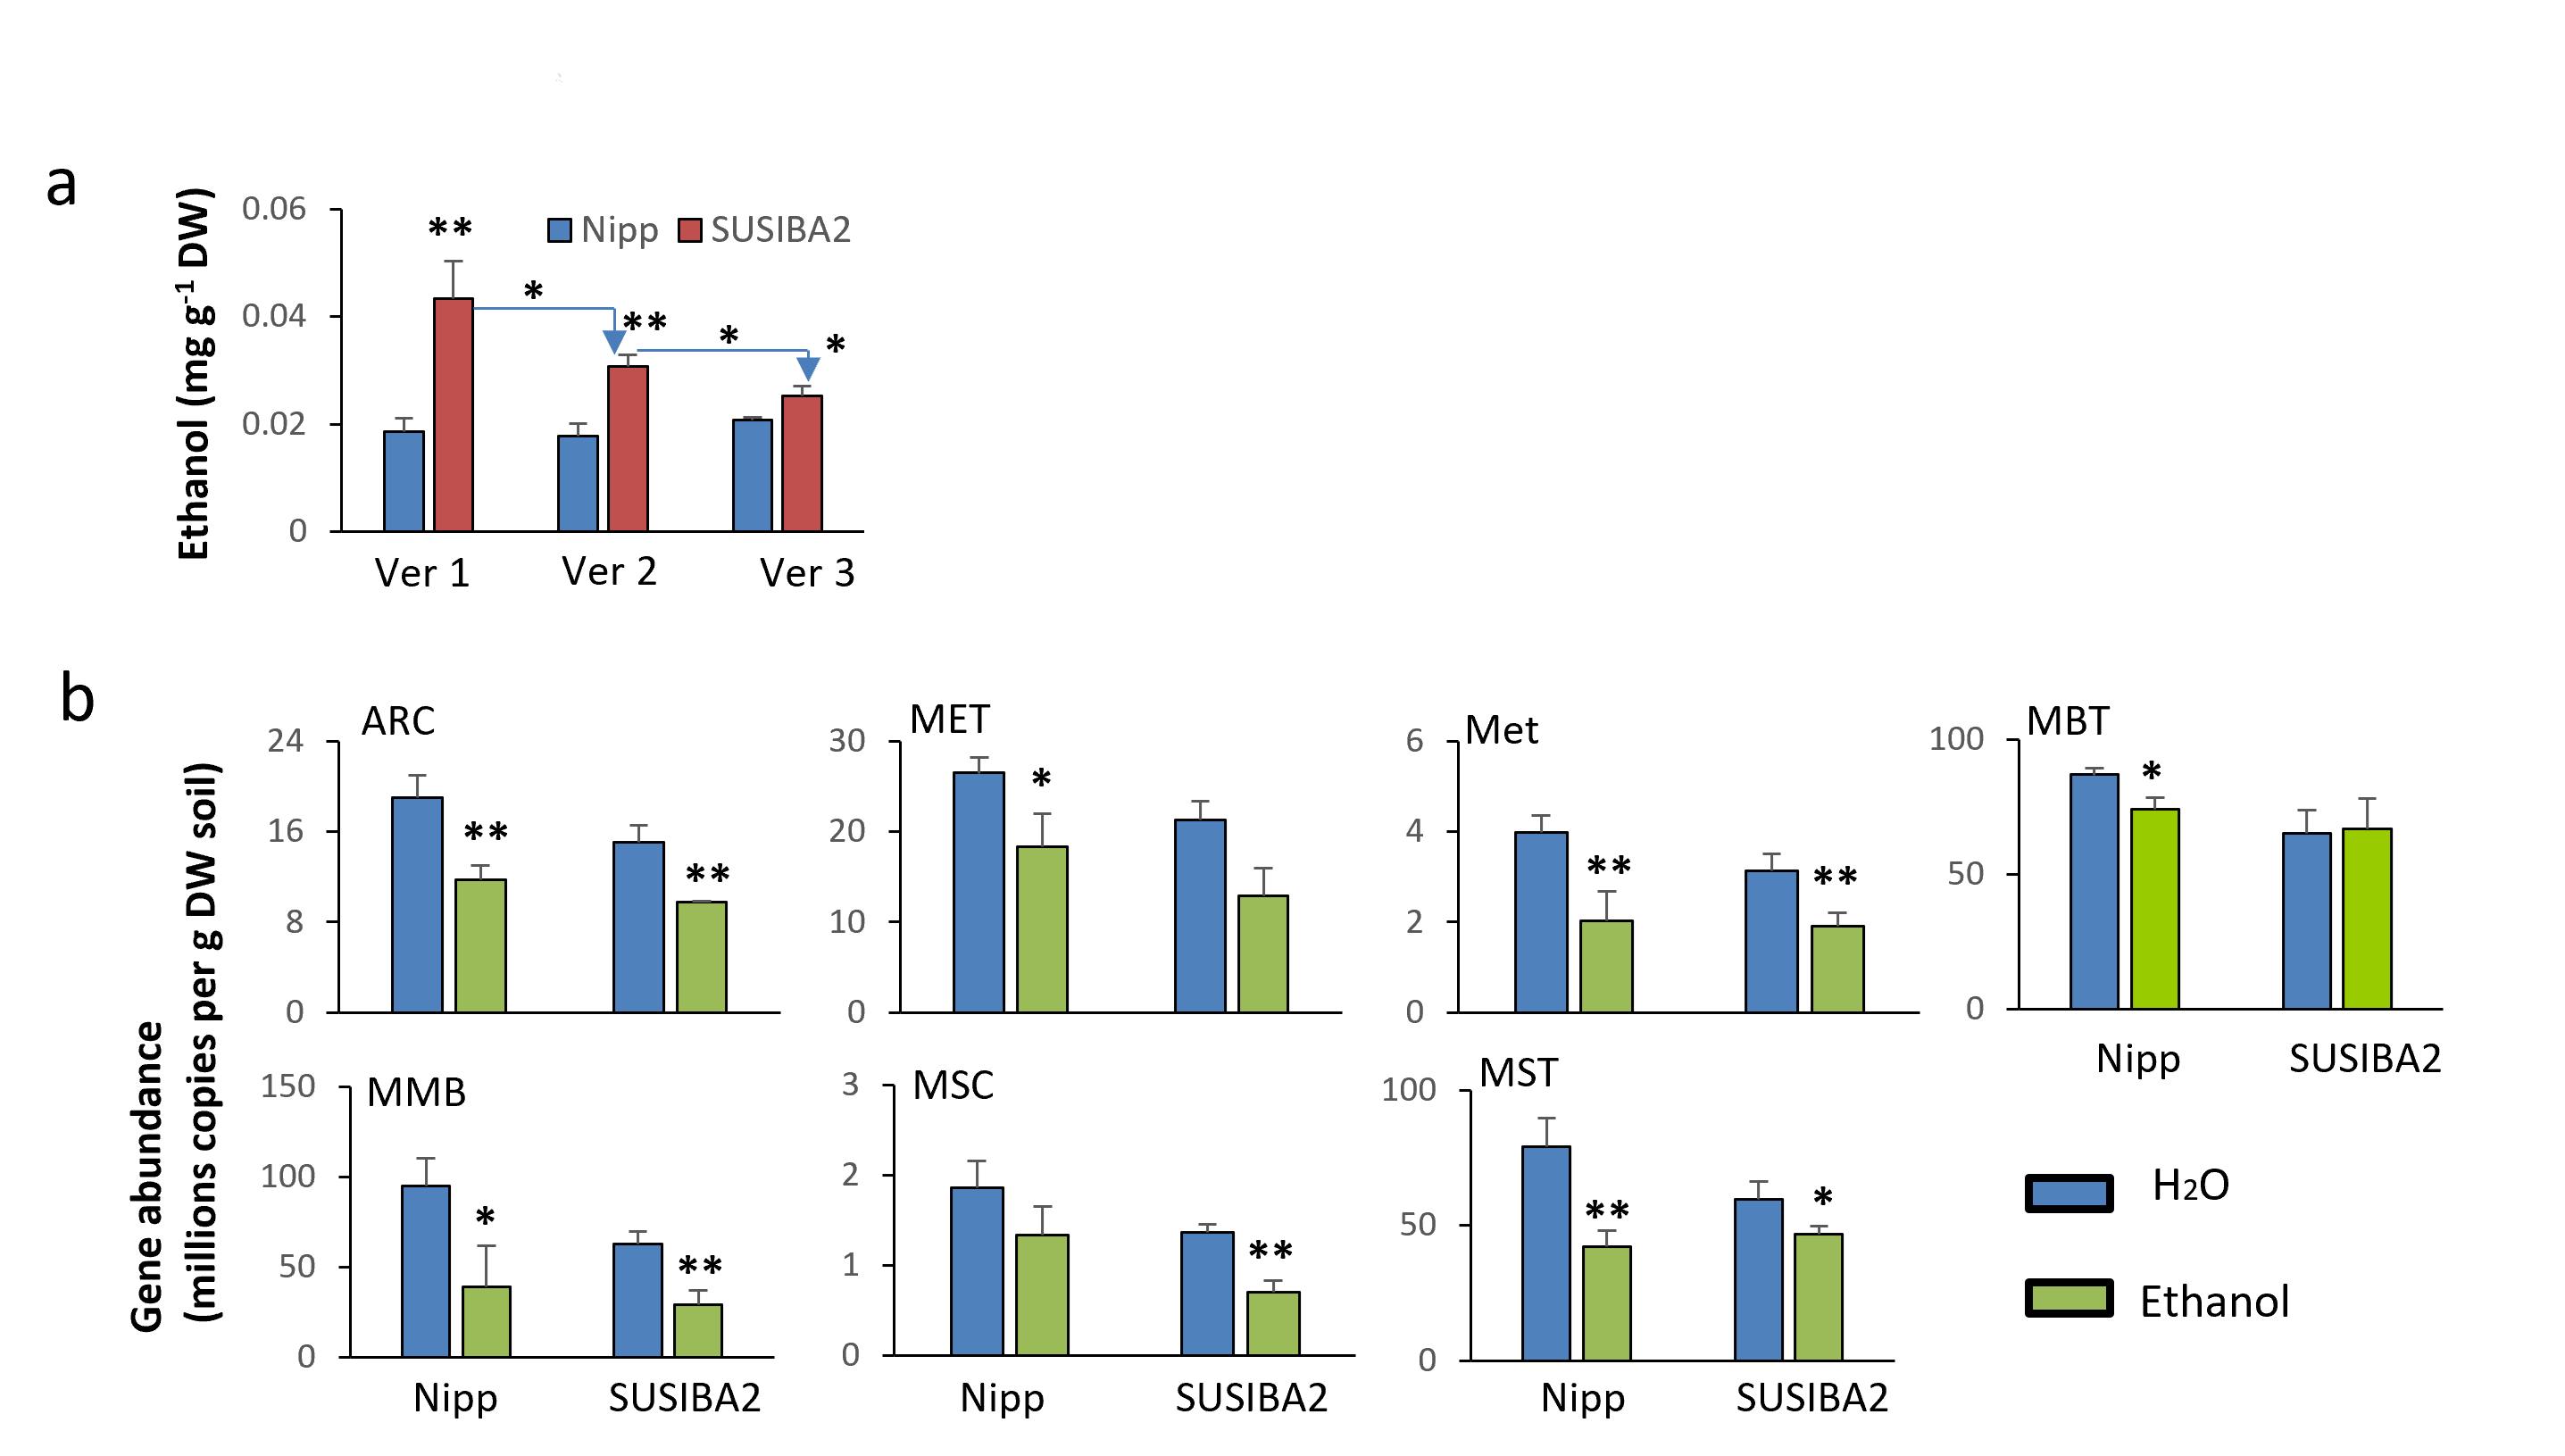


**Supplementary Fig. 10│Distribution analysis of ethanol from the vertical position and qPCR quantification of rhizospheric methanogenic communities after ethanol treatment in the phytotron**

a, Distribution of rhizospheric ethanol from Ver 1 to Ver 3 of rice root in the phytotron. Plants of 8 wap were used

b, qPCR quantification of rhizospheric methanogenic communities with ethanol treatment in the phytotron. Samples from 5 cm depth and 5 cm from the rice plant were collected, rhizospheric soil including root was used for DNA extraction and isolated DNA was used for methanogenic community analysis. Seven pairs of primers (Supplementary Table 1) were used for the quantification.

A statistically significant difference was obtained between Nipp and SUSIBA2 for Ver 2 to Ver 1 and Ver 3 to Ver 2 (a) as well as between ethanol and H2O treatment in Nipp and SUSIBA2 (b). Three plants were used, and experiments in this figure were repeated three times with similar trends. T.TEST was used, ***P* ≤ 0.01 or **P* ≤ 0.05, error bars show s.d.


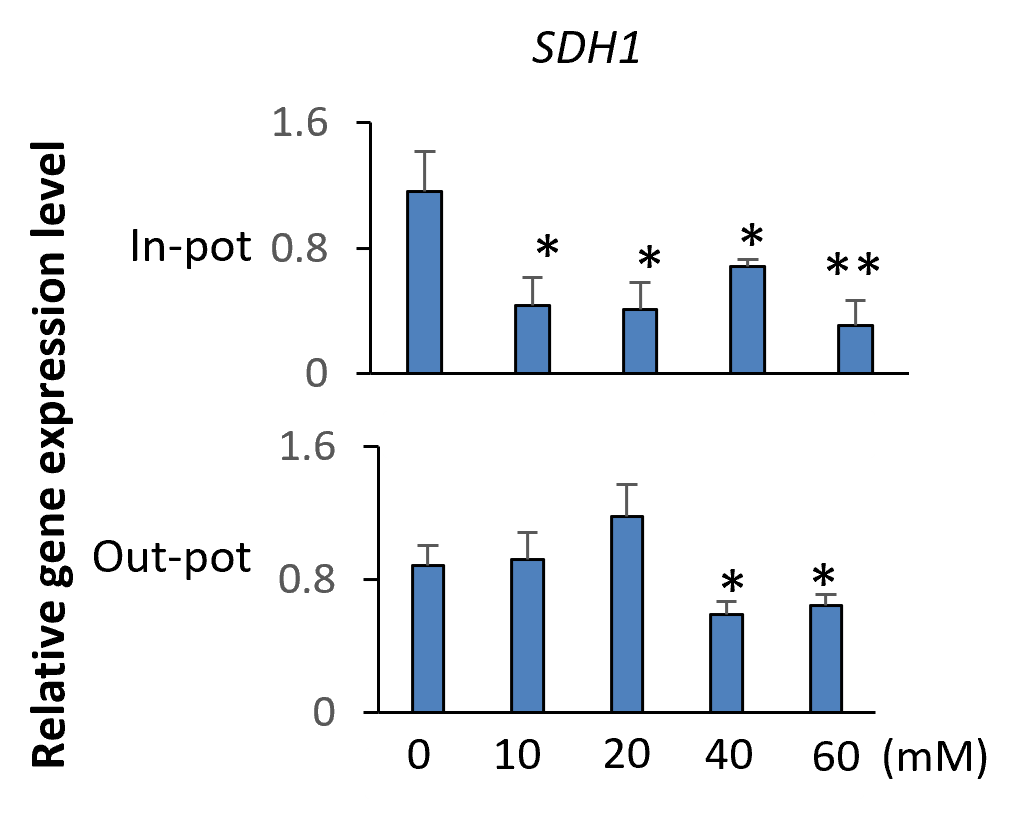


**Supplementary Fig. 11│Inhibition of gene expression levels by external addition of ethanol in rice root**

Ethanol inhibition of *succinic dehydrogenase* *1* (*SDH1*)expression was detected from 10 mM with in-pot rice root and from 40 mM with out-pot rice root respectively. Three plants were used, and experiment in this figure was repeated three times with similar trends. Significant differences between ethanol-treated and water (H2O) are indicated by asterisks (***P* ≤ 0.01 or **P* ≤ 0.05). T.TEST was used (error bars show s.d).


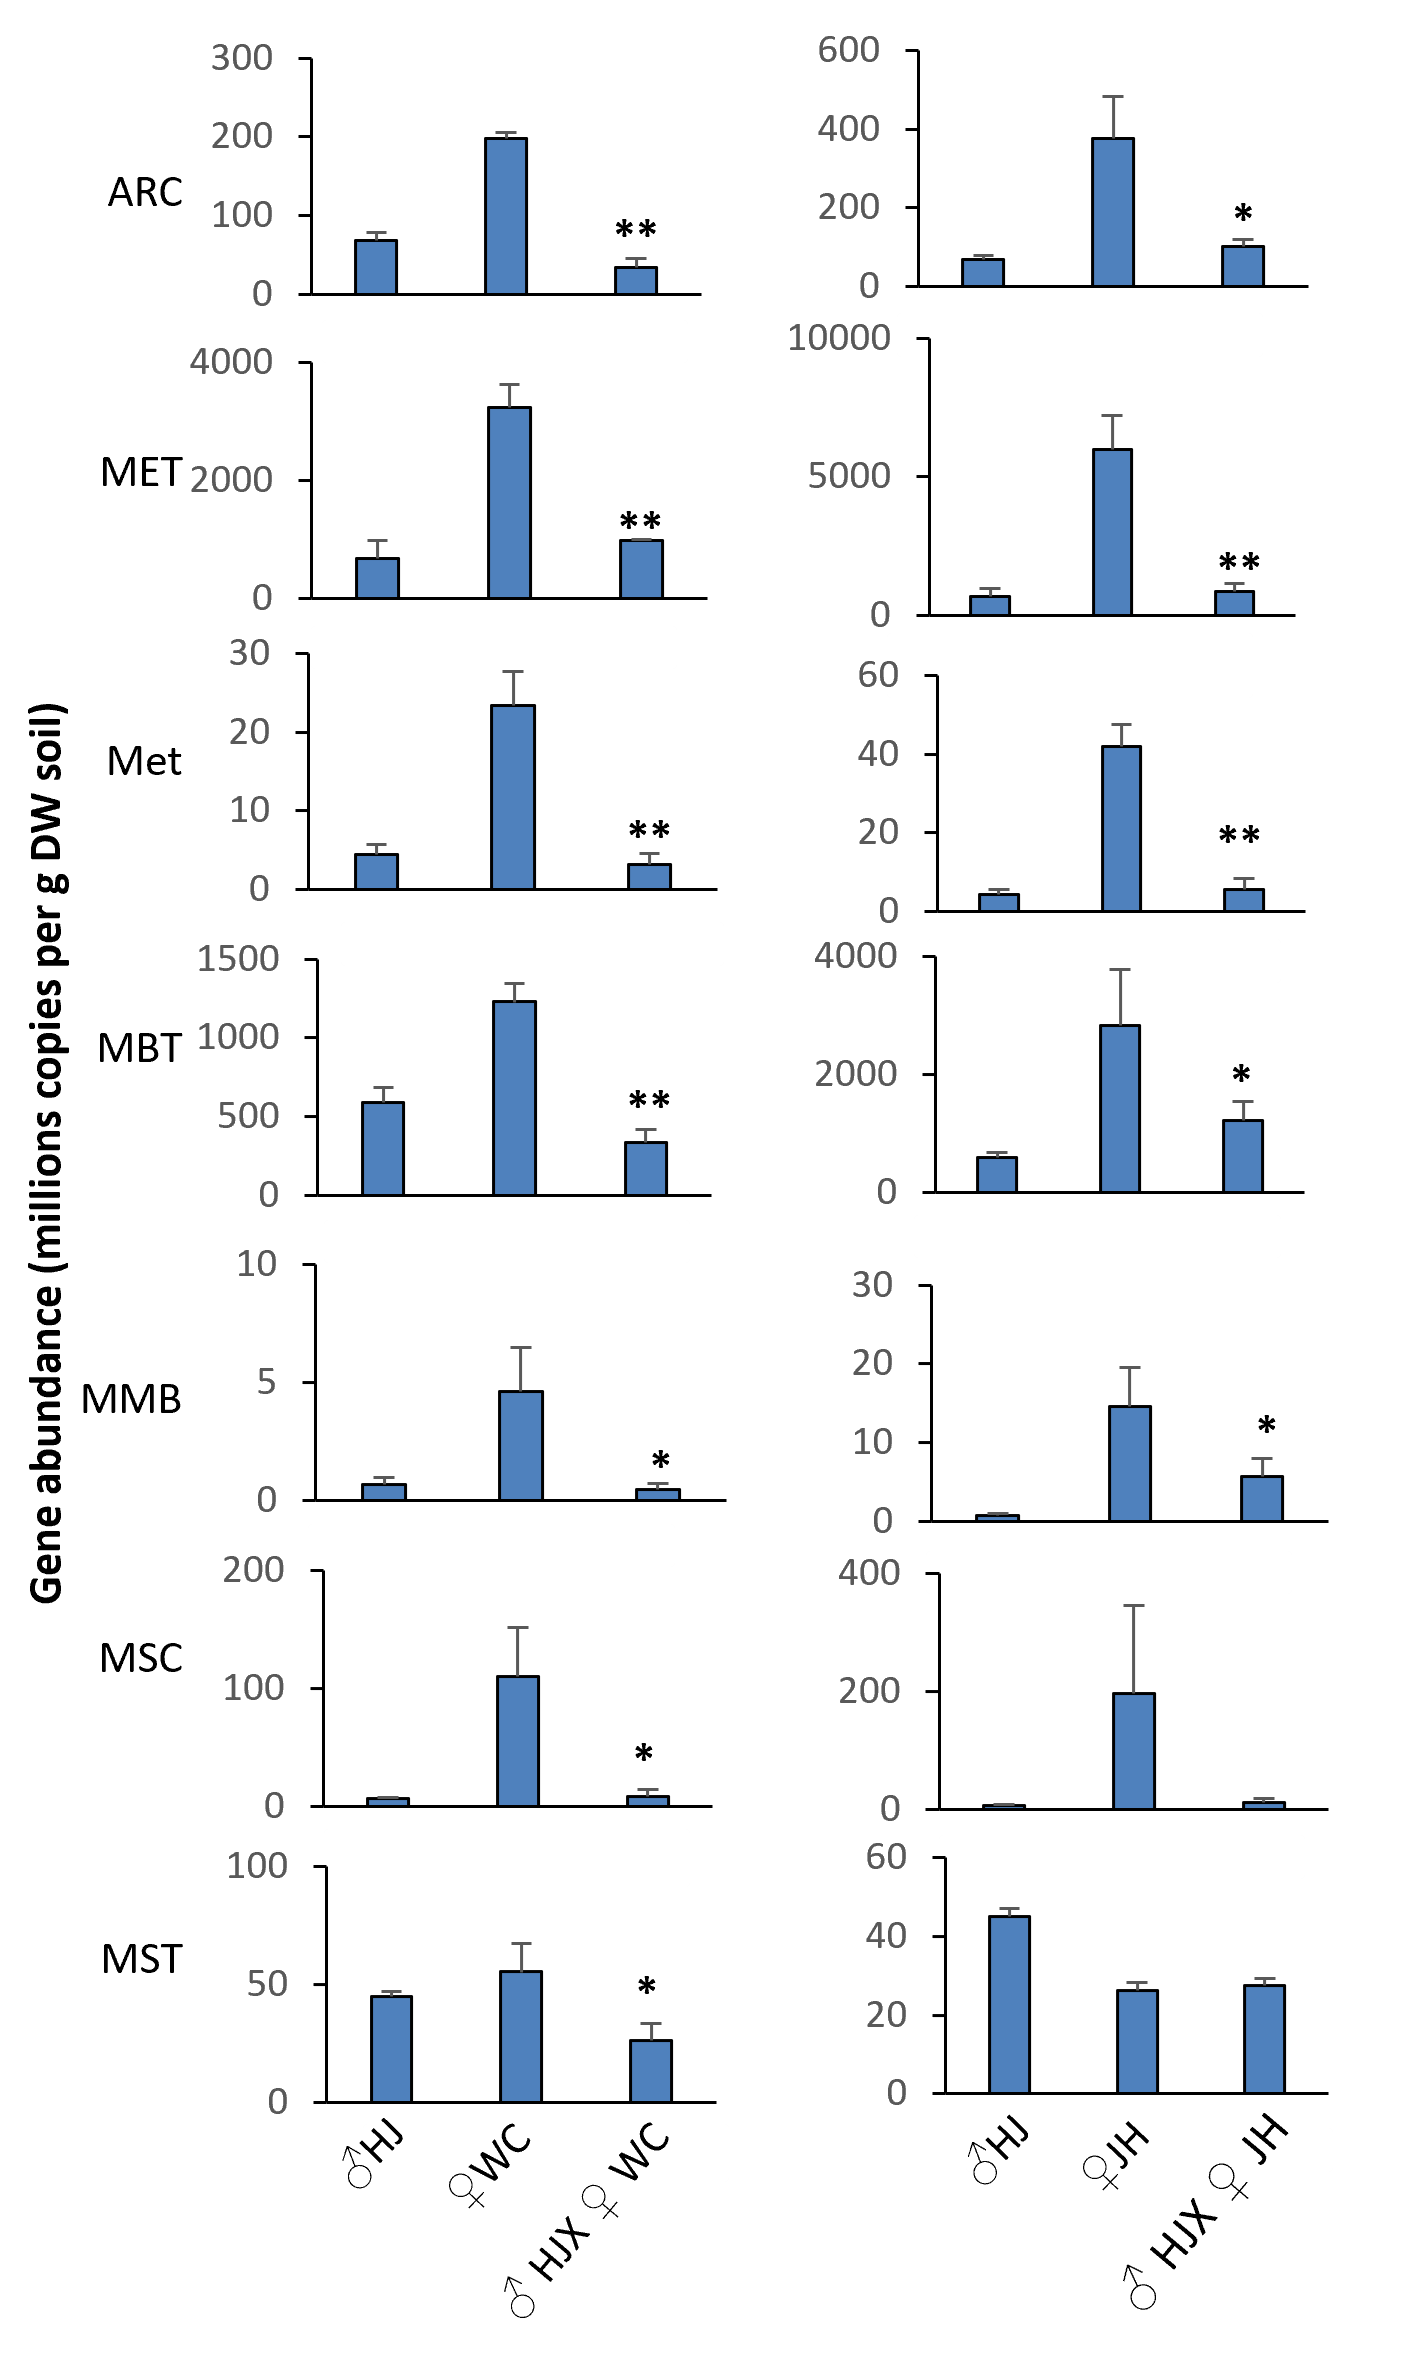


**Supplementary Fig. 12│Abundance analysis of rhizospheric methanogens from hybrid-breeding lines at the flowering stage in the phytotron**

Samples from 5 cm depth and 5 cm away from the rice plant were collected, rhizospheric soil including the root was used for DNA extraction and isolated DNA was used for methanogenic community analysis. Seven pairs of primers (Supplementary Table 1) were used for quantification.

HJ was used as the paternal line, and WC and JH were used as the maternal lines respectively. Three plants were used, and the experiment illustrated in this figure was repeated three times with similar trends. Significant differences between breeding line and maternal are indicated by asterisks (***P* ≤ 0.01 or **P* ≤ 0.05). T.TEST were used, error bars show s.d.


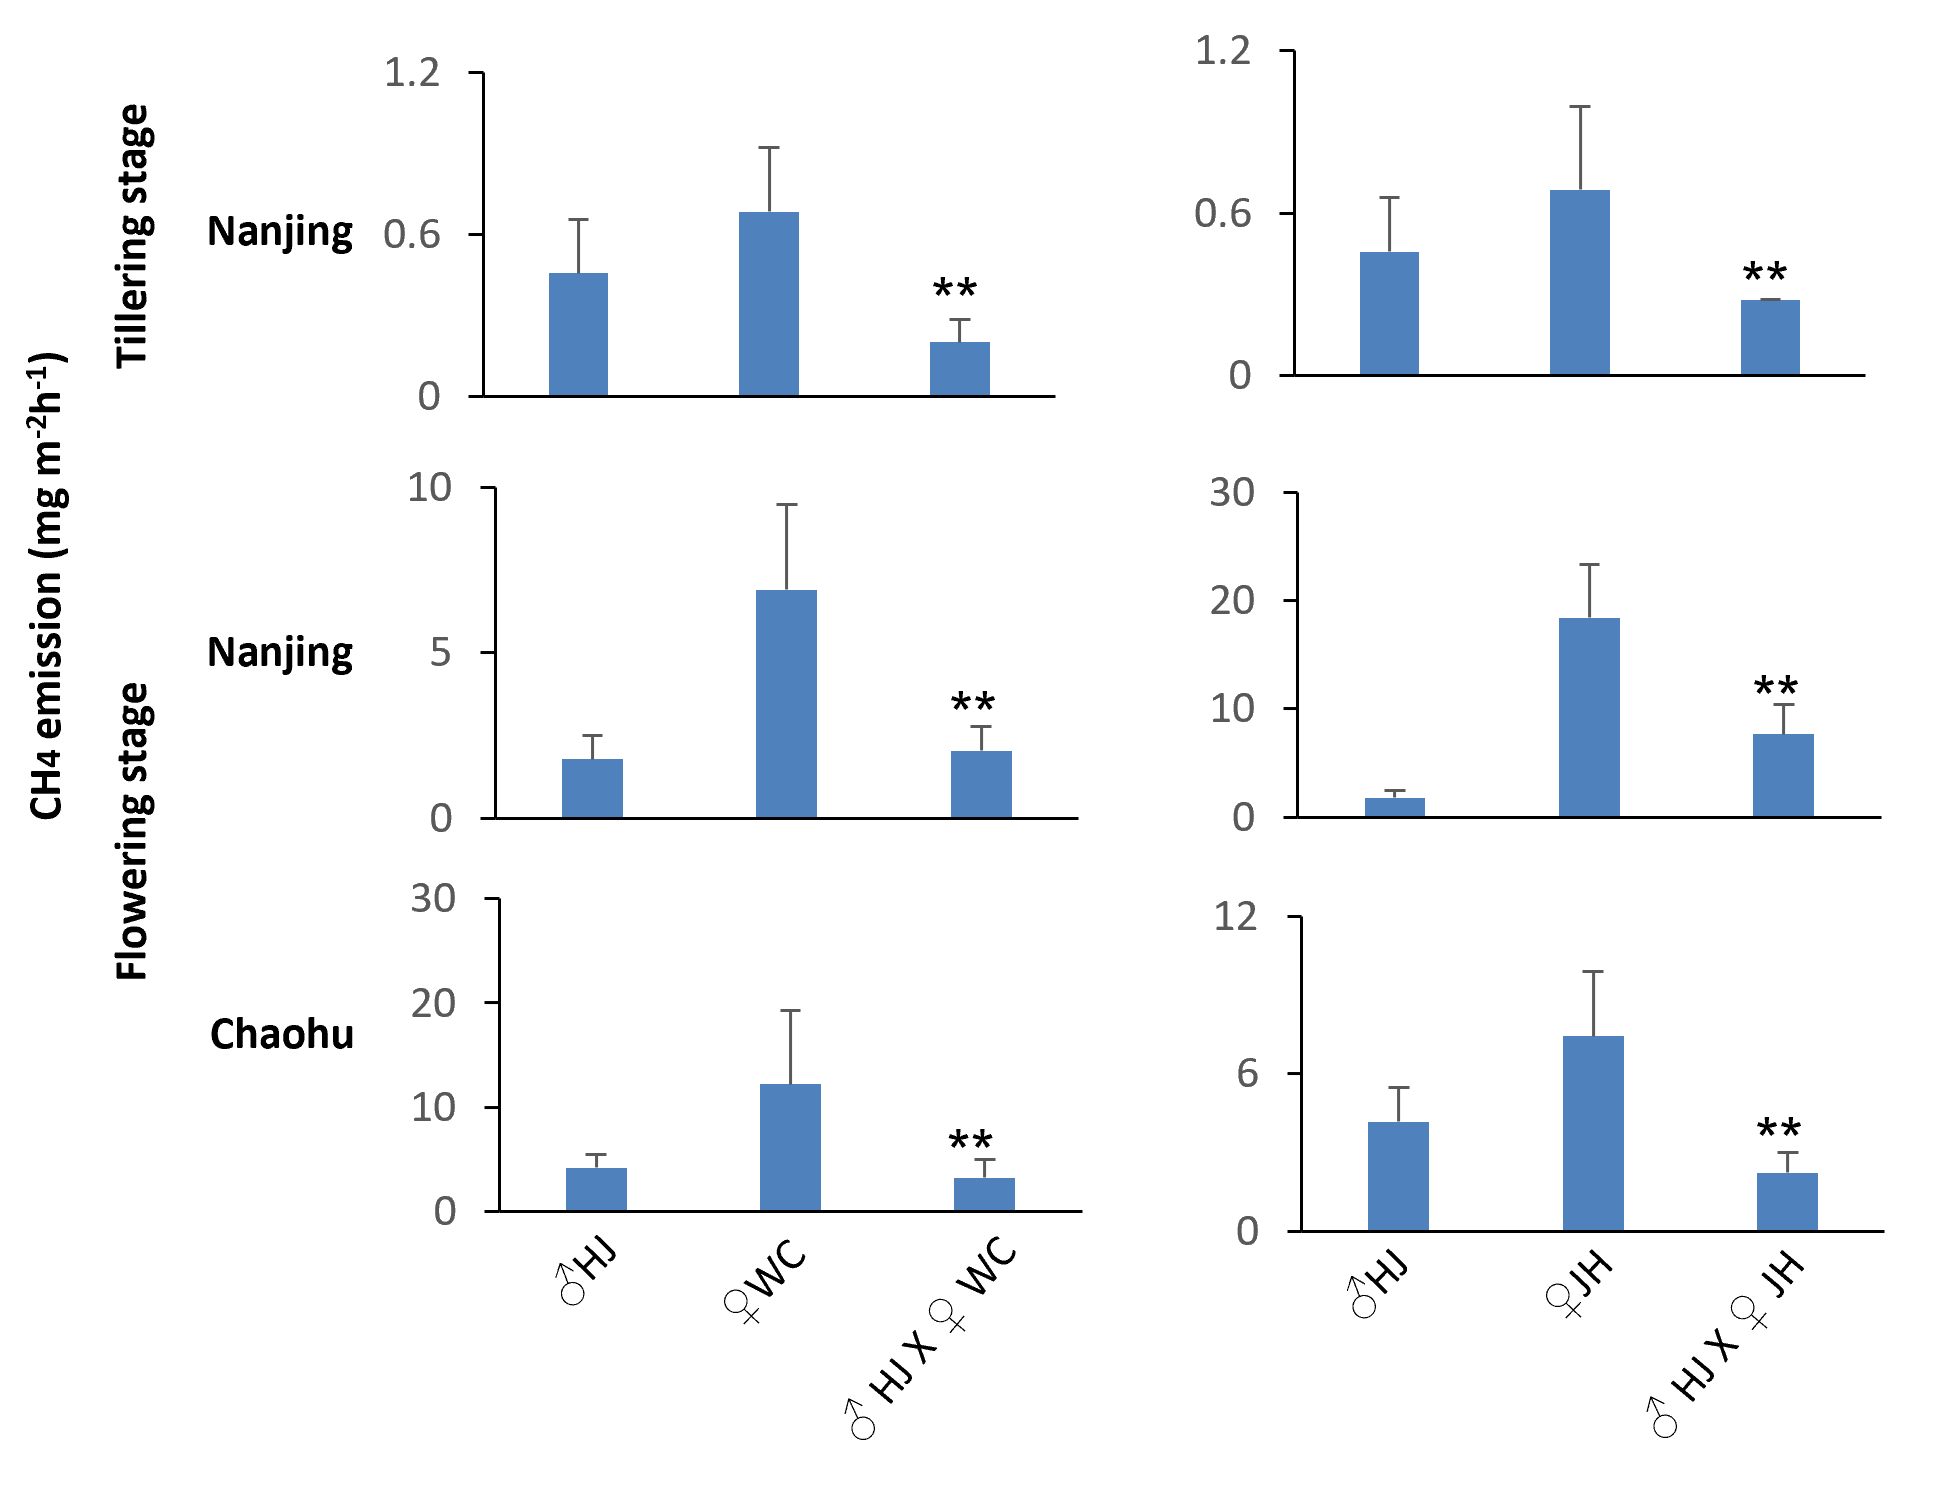


**Supplementary Fig. 13│Methane emission from LFHE breeding lines in 2021 at two sites in China**

Methane emissions of ten independent plants (n=10) from two time points in Nanjing and one time point in Chaohu during the time 10:00 am are indicated. Significant differences between breeding lines and corresponding maternal are indicated by asterisks (***P* ≤ 0.01). T.TEST were used, error bars show s.d. HJ: Heijing, JH: Jiahua, WC: Wuchang, ♂: paternal, ♀: maternal, LFHE: low-fumarate high-ethanol.


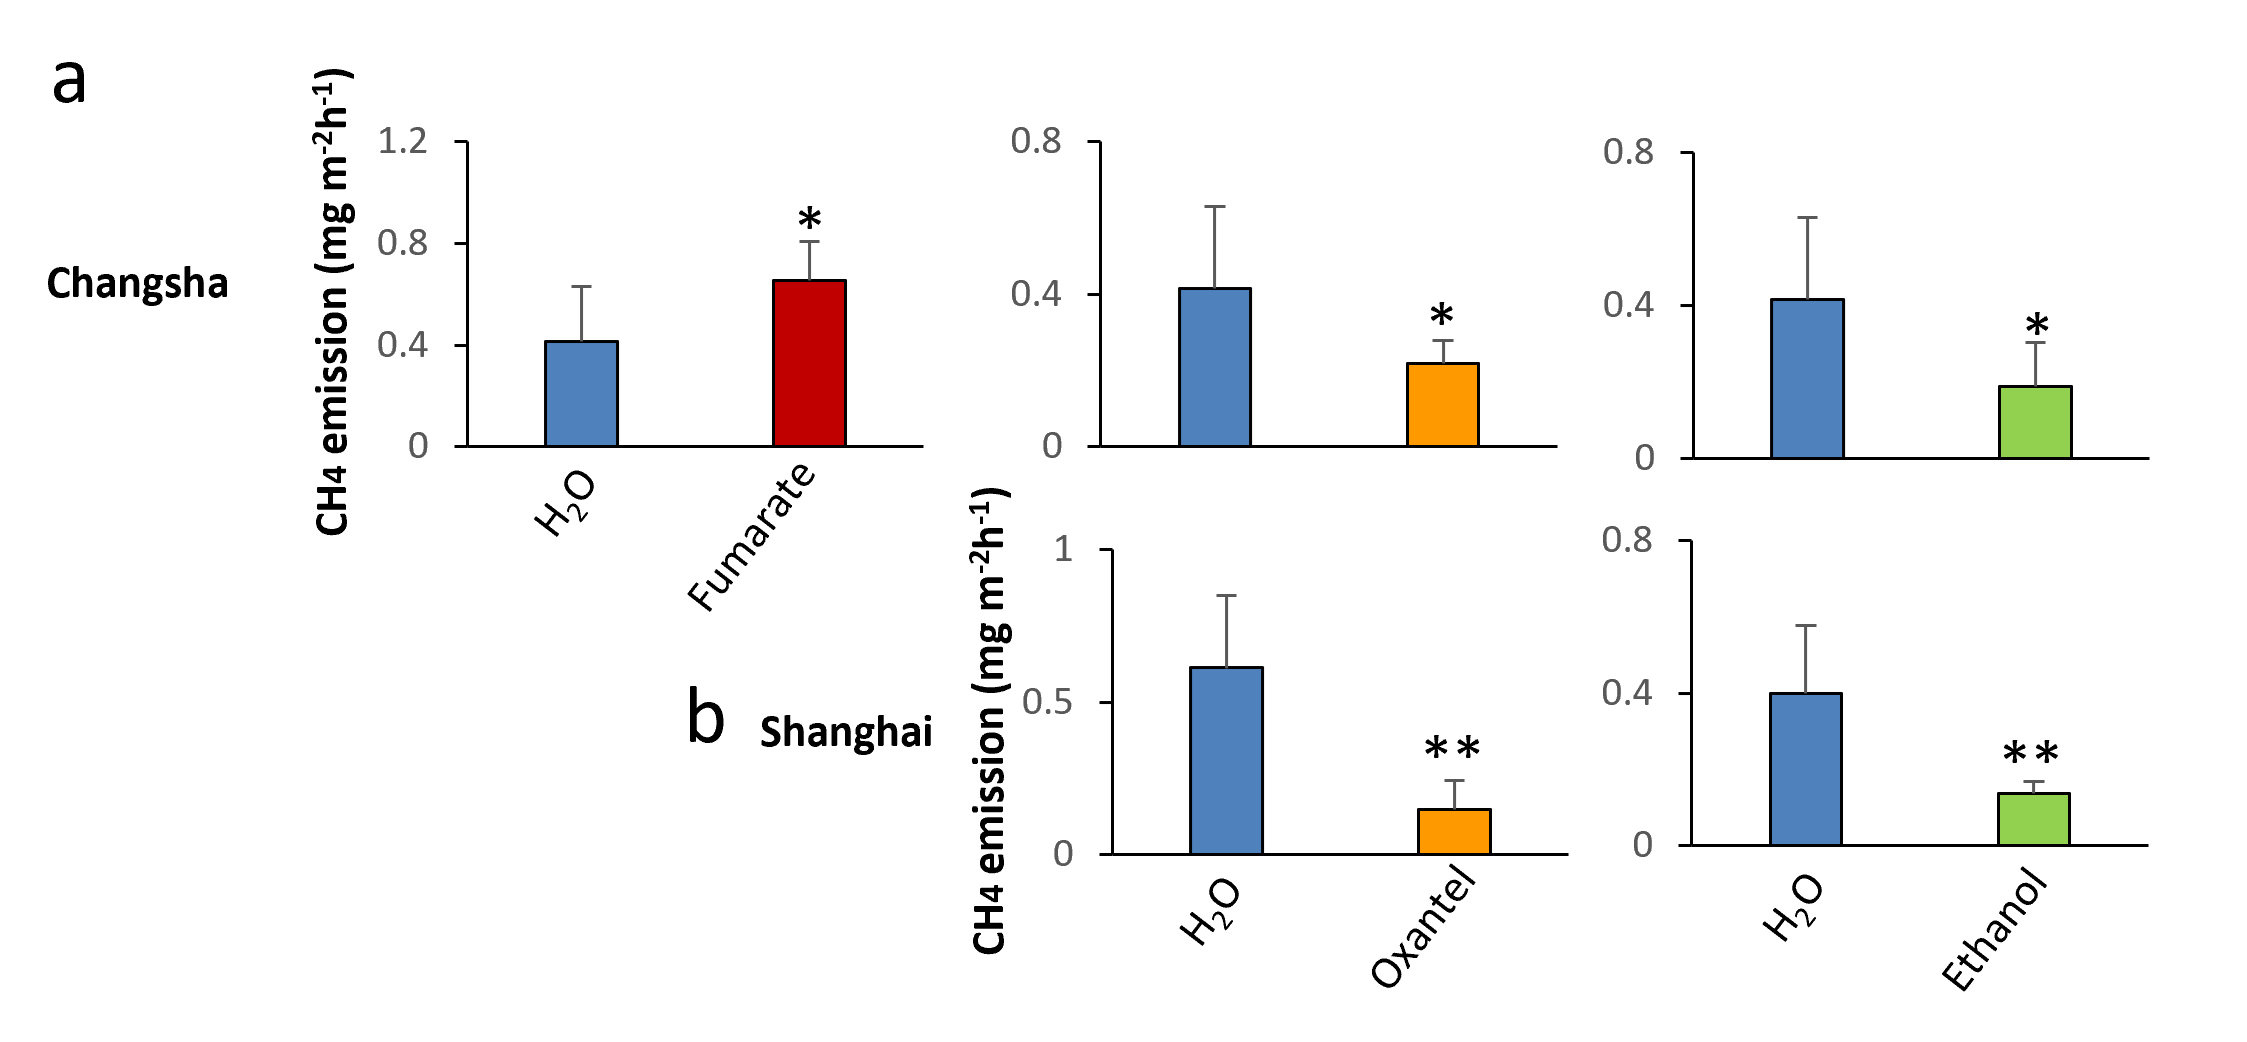


**Supplementary Fig. 14│Application of oxantel and ethanol in reducing methane emission from rice paddies in 2020 at two sites in China**

Display of methane emission from at least 6 plants (n=6) with the addition of chemicals to the paddies in Changsha (a) and Shanghai (b). Water was used as the negative control and fumarate was used as the positive control in Changsha. Nipponbare was used for the treatment, significant differences between chemicals and water treatment are indicated by asterisks (***P* ≤ 0.01 or **P* ≤ 0.05). T.TEST was used, error bars show s.d.


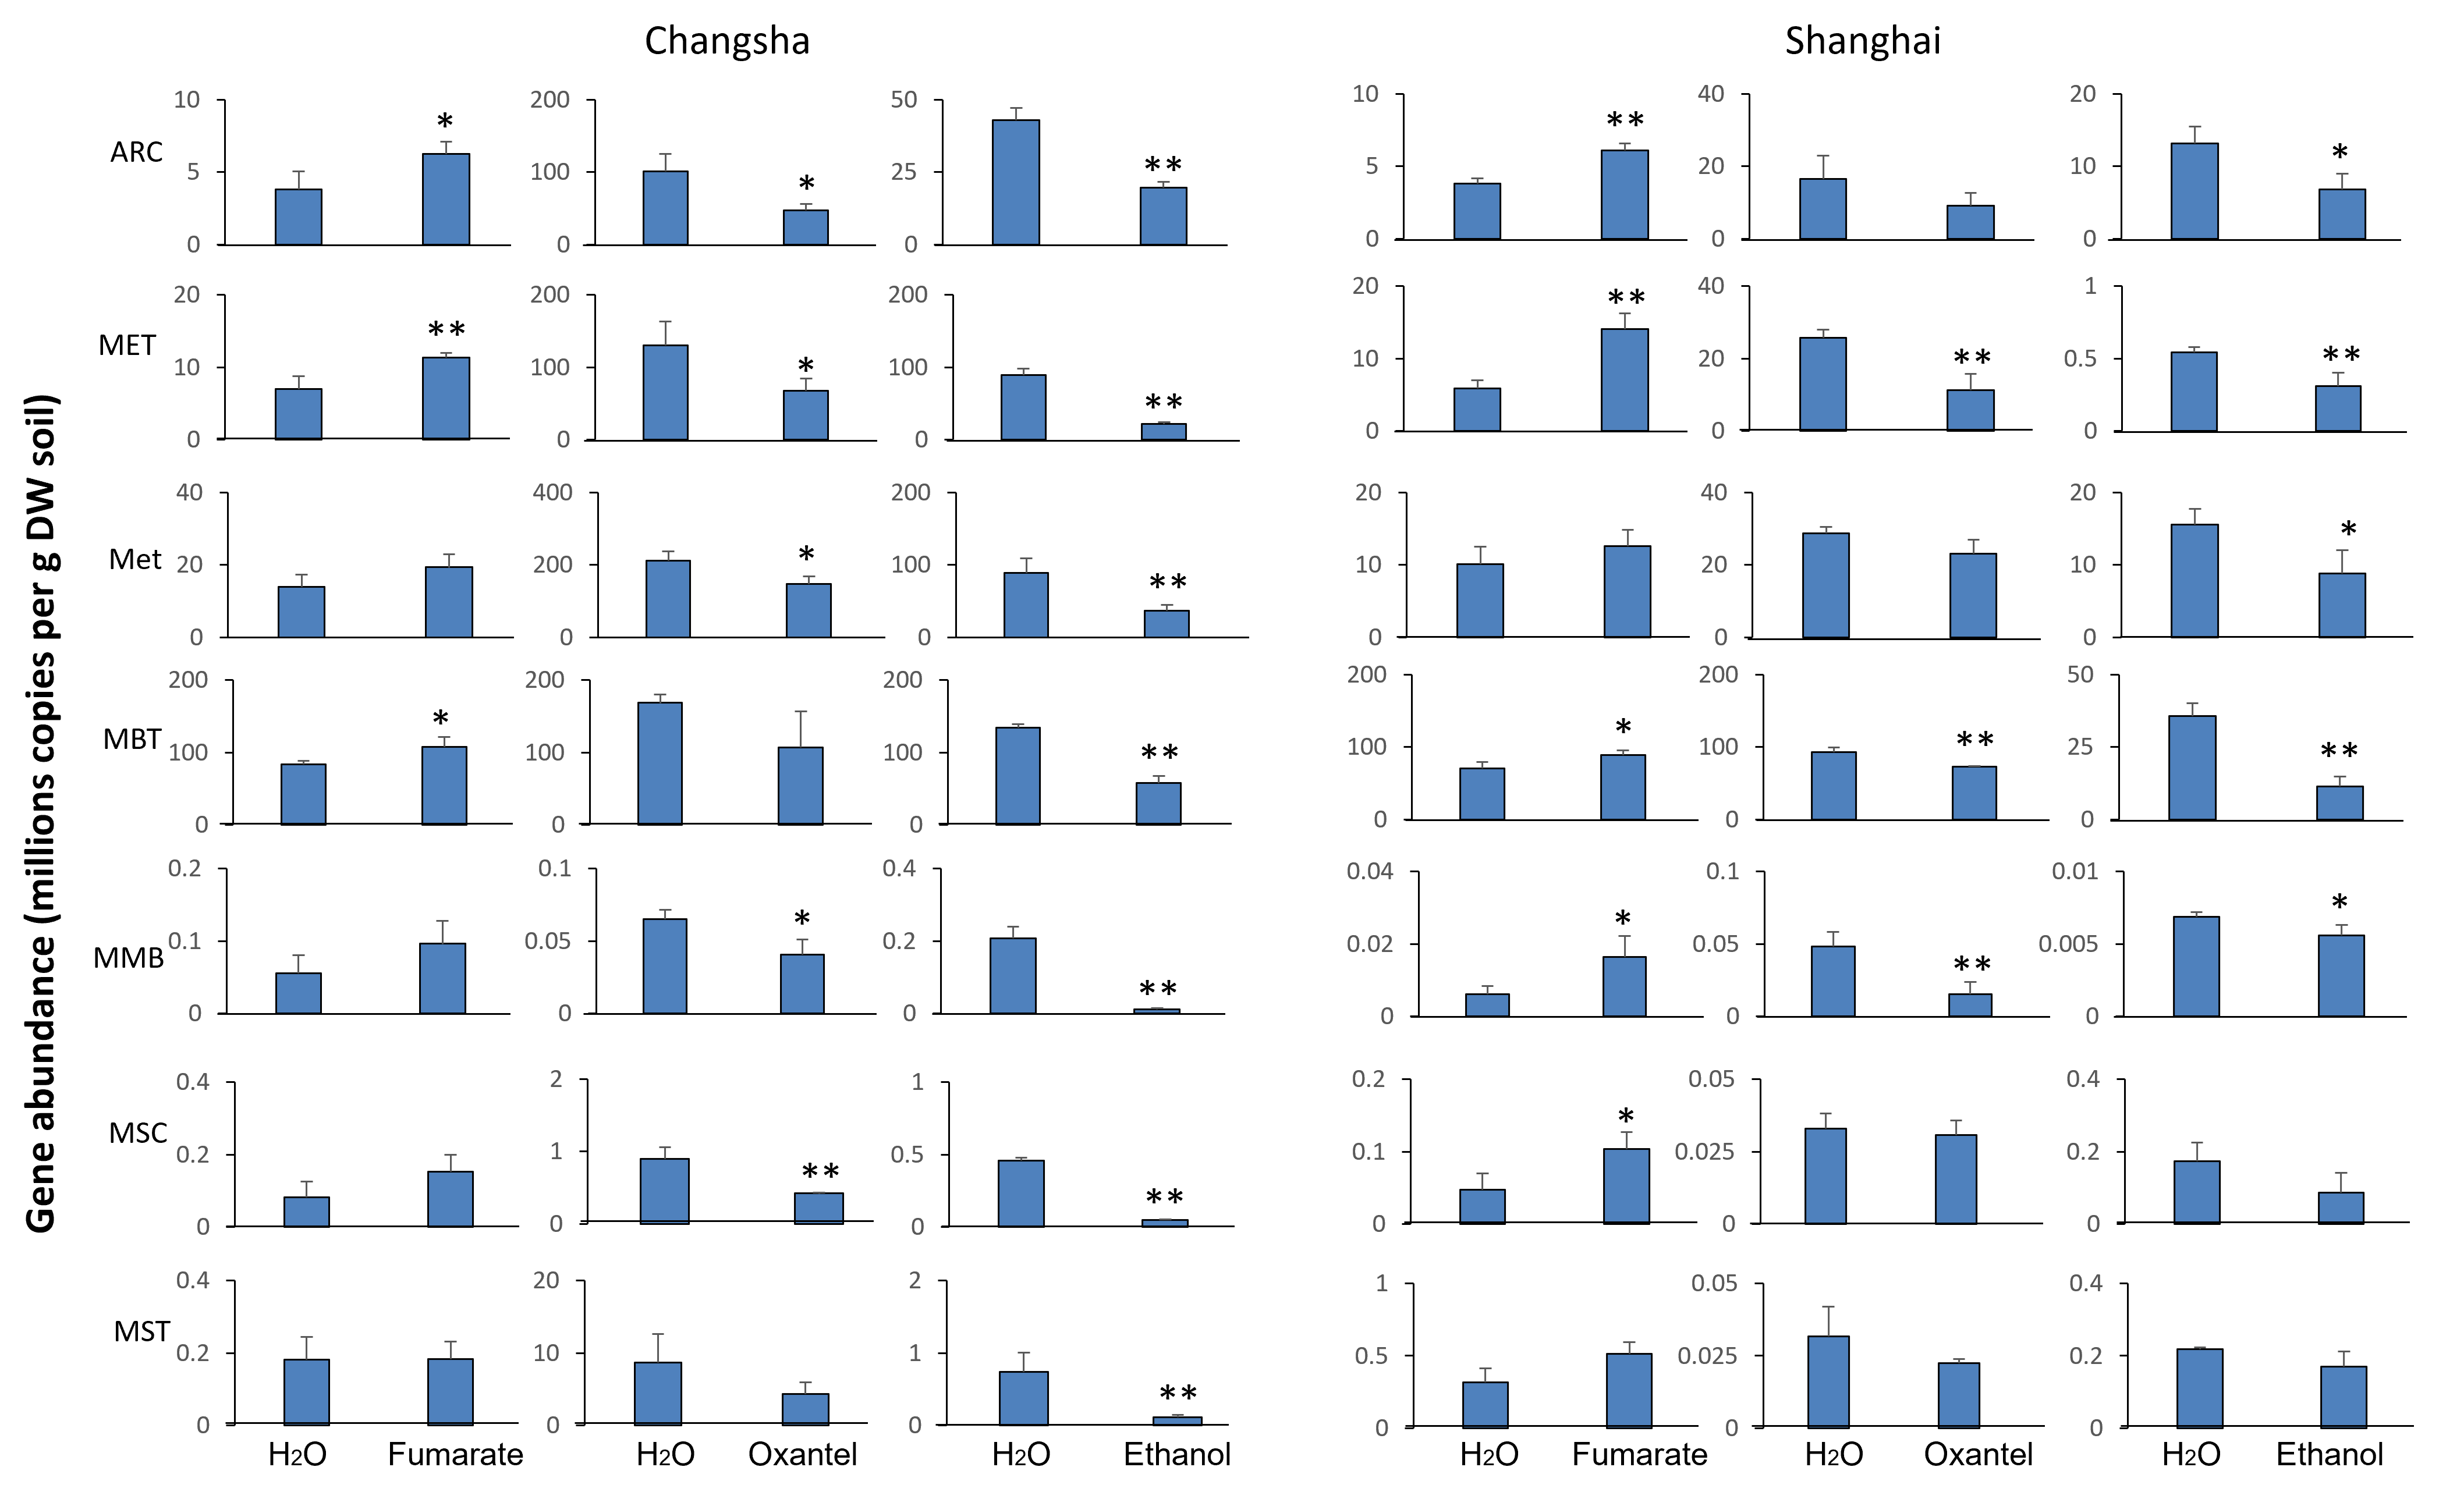


**Supplementary Fig. 15│qPCR quantification of rhizospheric methanogens associated with different chemical treatment from rice paddies**

Rhizospheric soil including root was sampled from 5 cm depth and 5 cm away from three independent plants with fumarate, oxantel and ethanol treatments respectively. Changsha (a) and Shanghai (b) were set up as different position replicates. Significant differences between chemical treatment and control are indicated by asterisks (***P* ≤ 0.01 or **P* ≤ 0.05), H2O was used as the control. T.TEST were used, error bars show s.d.

**Supplementary Table 1 │Illustration of genes for fumarate and ethanol synthesis from RNAseq**

| Gene Location | Log2 Fold change | pvalue | Description |
| --- | --- | --- | --- |
| LOC_Os02g04170 | -1.16747 | 0.00675 | FAD-containing enzymes are responsible for the catalysis of fumarate and succinate interconversion; the fumarate reductase is used in anaerobic growth, and the succinate dehydrogenase is used in aerobic growth. (*SDH*) |
| LOC_Os10g07229 | 1.126432716 | 0.009401 | Alcohol dehydrogenase superfamily, zinc-containing protein (*ADH*) |

Comparison of SUSIBA2 rice to Nipp was performed manually, Log2Fold change >1 or <-1 and P value <0.05 were set up for the significant definition.

**Supplementary Table 2** **│ Phenotypic analysis of field rice after chemical treatment**

a, Phenotypic analysis of field rice in Changsha

|  | H2O | Fumarate | | Oxantel | | Ethanol | |
| --- | --- | --- | --- | --- | --- | --- | --- |
| Plant height (cm) | 64.84±3.12 | | 63.37±4.23 | | 64.14±3.90 | | 64.24±3.18 | |
| Panicle length (cm) | 16.26±0.71 | | 16.26±1.13 | | 16.40±1.02 | | 16.35±0.76 | |
| Panicle number | 21.5±4.66 | | 24.37±6.04* | | 23.7±4.34 | | 23.53±4.66 | |
| Full filled grain | 604.36±127.34 | | 617.48±167.92 | | 659.8±145.46 | | 676.64±139.83 | |
| Yield per plant (g) | 14.99±3.59 | | 15.32±5.27 | | 17.00±3.40 | | 16.82±3.08 | |

b, Phenotypic analysis of field rice in Shanghai

|  | | | H2O | Fumarate | | Oxantel | | Ethanol | |
| --- | --- | --- | --- | --- | --- | --- | --- | --- | --- |
| Plant height (cm) | 64.83±6.10 | | | | 68.17±4.59* | | 69.17±5.64** | | 68.87±4.26** | |
| Panicle length (cm) | | 13.3±1.90 | | | 13.72±2.02 | | 15.1±1.73** | | 15.47±1.74** | |
| Panicle number | 23.92±4.84 | | | | 20.30±4.23** | | 18.81±2.76** | | 19.35±4.49** | |
| Full filled grain | 779.23±175.17 | | | | 699.86±89.74 | | 699.95±77.32 | | 756.42±132.93 | |
| Yield per plant(g) | 19.57±0.91 | | | | 15.29±2.89 | | 18.66±5.81 | | 18.28±1.36 | |

Phenotypic profiling of Nipponbare with different chemical treatments in the field in summer 2020 at two sites in China.

Plant height, panicle length, panicle number, full filled grain and yield per plant were statistically analysed with rice plants from both Changsha (a) and Shanghai (b). Significant differences between fumarate, oxantel, ethanol treatments and H2O are indicated by asterisks (***P* ≤ 0.01 or **P* ≤ 0.05). T.TEST was used, error bars show s.d. At least 15 plants were used (n≥ 15) for statistical analysis

**SI Table 2 │Oligonucleotides used in this study**

| **Primers for quantitative PCR** | | | | |
| --- | --- | --- | --- | --- |
| Primer name | Gene name | GeneBank Accession No | Position  (nt No) | Primer sequence (5'→3') |
| SDH1F | *Succinic dehydrogenase* | XM_015791506 | 1652-1866 | CTGCTGTCTTCCGTACGCAA |
| SDH1R | ACGAGCATGAGCTCCTCTGC |
| PDC1F | *pyruvate decarboxylase 1* | OSU07339 | 1590-1719 | GTGCGGGCAGA AGAGCATCA |
| PDC1R | GTTGTGGATGGCGTCGATGAG |
| ADH1F | *Alcohol Dehydrogenase 1* | XM_015761367 | 1237-1371 | GGTGTTGCTGTTTTGGTCGG |
| ADH1R | ACGACGTTGGGCAGATCGGTG |
| ADH2F | *Alcohol Dehydrogenase 2* | AB208538 | 2639-2898 | CCACCCGATGAACTTCCTCAAC |
| ADH2R | CTTCTCCAGCTCCAGCTCCTTC |
| **Primers to quantify methanogenic groups** | | | | |
| Mst702F | Methanosaetaceae (Mst) | |  | TAATCCTYGARGGACCACCA |
| Mst862R | CCTACGGCACCRACMAC |
| Met630F | Total methanogens (MET) | |  | GGATTAGATACCCSGGTAGT |
| Met803R | GTTGARTCCAATTAAACCG |
| Msc380F | Methanosarcinaceae (Msc) | |  | GAAACCGYGATAAGGGGA |
| Msc828R | TAGCGARCATCGTTTACG |
| MBT857F | Methanobacteriales (MBT) | |  | CGWAGGGAAGCTGTTAAGT |
| MBT1196R | TACCGTCGTCCACTCCTT |
| MMB282F | Methanomicrobiales (MMB) | |  | ATCGRTACGGGTTGTGGG |
| MMB832R | CACCTAACGCRCATHGTTTAC |
| ARC787F | Archaea (ARC) | |  | ATTAGATACCCSBGTAGTCC |
| ARC1059R | GCCATGCACCWCCTCT |
| G.Sulf923F | *Geobacter sulfurreducens*  strain AM-1 | |  | TGACATCCACGGAACCCTCC |
| G.Sulf1399R | GACGCTGCCTCCATTGCTG |
| Mcl282F | Methanocella (Met) | |  | ATCMGTACGGGTTGTGGG |
| Mcl832R | CACCTAGCGRGCATCGTTTAC |
| **Primers to bacterial and archaeal 16S rRNA gene sequencing** | | | | |
| 515′F | Bacteria | |  | GTGBCAGCMGCCGCGGTAA |
| 805R | GACTACHVGGG TATCTAATCC |
| 516F | Archaea | |  | TGYCAGCCGCCGCGGTAAHACCVGC |
| 915R | GTGCTCCCCCGCCAATTCCT |
